# Supplementary material for: Symmetry-breaking host–guest assembly in a hydrogen-bonded supramolecular system
Source: PubMed Central journal article supplement (PMC9834293; doi:10.1038/s41467-023-35850-4), 2023-01-11
Supplement: 41467_2023_35850_MOESM1_ESM.pdf [file 41467_2023_35850_MOESM1_ESM.pdf]

# Supplementary Information

## **Symmetry-Breaking Host–guest Assembly in a Hydrogen-bonded Supramolecular System**

Shinnosuke Horiuchi<sup>\*,1,2,3</sup>, Takumi Yamaguchi<sup>4</sup>, Jacopo Tessarolo<sup>2</sup>, Hirotaka Tanaka<sup>1</sup>, Eri Sakuda<sup>1,2</sup>, Yasuhiro Arikawa<sup>1</sup>, Eric Meggers<sup>5</sup>, Guido H. Clever<sup>\*,2</sup>, Keisuke Umakoshi<sup>\*,1</sup>

<sup>1</sup>Division of Chemistry and Materials Science, Graduate School of Engineering, Nagasaki University, 1-14 Bunkyo-machi, Nagasaki 852-8521, Japan.

<sup>2</sup>Department of Chemistry and Chemical Biology, TU Dortmund University, Otto-Hahn-Straße 6, 44227 Dortmund, Germany.

<sup>3</sup>Department of Basic Science, Graduate School of Arts and Sciences, The University of Tokyo, 3-8-1 Komaba, Meguro-ku, Tokyo 153-8902, Japan.

<sup>4</sup>School of Materials Science, Japan Advanced Institute of Science and Technology, 1-1 Asahidai, Nomi 923-1292, Japan.

<sup>5</sup>Fachbereich Chemie, Philipps-Universität Marburg, Hans-Meerwein-Straße 4, 35043 Marburg, Germany.

\*E-mail: shoriuchi@g.ecc.u-tokyo.ac.jp, kumks@nagasaki-u.ac.jp

## Table of Contents

|                                                                                                                         |    |
|-------------------------------------------------------------------------------------------------------------------------|----|
| • <b>Materials</b> .....                                                                                                | 2  |
| • <b>Synthetic procedure of the components</b> .....                                                                    | 2  |
| • <b>General procedure of encapsulation experiments</b> .....                                                           | 4  |
| Plausible self-assembly and encapsulation mechanism of <b>(1a)<sub>6</sub>⊃([2a]Cl)</b> .....                           | 4  |
| NMR and ESI-MS spectra of <b>(1)<sub>6</sub>⊃([2a]Cl)</b> .....                                                         | 5  |
| A molecular model of <b>(1)<sub>6</sub>⊃[2a]<sup>+</sup></b> .....                                                      | 12 |
| NMR and ESI-MS spectra of <b>(1)<sub>6</sub>⊃([2a]NO<sub>3</sub>)</b> .....                                             | 13 |
| NMR spectra of a mixture of <b>(1a)<sub>6</sub></b> and <b>[2a]PF<sub>6</sub></b> .....                                 | 16 |
| NMR and ESI-MS spectra of <b>(1)<sub>6</sub>⊃([2b]Cl)</b> .....                                                         | 16 |
| NMR and ESI-MS spectra of a mixture of <b>(1)<sub>6</sub></b> and <b>[2c]Cl</b> .....                                   | 18 |
| <sup>1</sup> H NMR and ESI-MS spectra of <b>(1)<sub>6</sub>⊃([3a]Cl<sub>2</sub>)</b> .....                              | 20 |
| <sup>1</sup> H NMR and ESI-MS spectra of <b>(1)<sub>6</sub>⊃([3b]Cl<sub>2</sub>)</b> . .....                            | 22 |
| Ion mobility spectra of <b>[(1b)<sub>5</sub>(3a)]<sup>2+</sup></b> and <b>[(1b)<sub>5</sub>(3b)]<sup>2+</sup></b> ..... | 23 |
| • <b>X-ray Structural Determination</b> .....                                                                           | 24 |
| Single crystal X-ray structure of <b>(1c)<sub>3</sub>⊃([3a]Cl<sub>2</sub>)</b> .....                                    | 26 |
| • <b>Photophysical studies in the non-chiral system</b>                                                                 |    |
| Photophysical data of <b>[2a]Cl</b> in the presence of <b>1a</b> .....                                                  | 29 |
| Photophysical data of <b>[2a]NO<sub>3</sub></b> in the presence of <b>1a</b> .....                                      | 30 |
| Photophysical data of <b>[2a]PF<sub>6</sub></b> in the presence of <b>1a</b> .....                                      | 31 |
| Photophysical data of <b>[2b]Cl</b> in the presence of <b>1a</b> .....                                                  | 32 |
| Photophysical data of <b>[2c]Cl</b> in the presence of <b>1a</b> .....                                                  | 33 |
| Photophysical data of <b>[3a]Cl<sub>2</sub></b> in the presence of <b>1a</b> .....                                      | 34 |
| Photophysical data of <b>[3b]Cl<sub>2</sub></b> in the presence of <b>1a</b> .....                                      | 35 |
| Proposed photo-excited dynamics after host–guest formation .....                                                        | 36 |
| • <b>Photophysical studies in the chiral system</b>                                                                     |    |
| <sup>1</sup> H NMR spectra of host–guest complexes of <b>Λ-</b> and <b>Δ-[2a]Cl</b> .....                               | 37 |
| CD spectra of <b>Λ/Δ-[2a]X</b> (X = Cl, NO <sub>3</sub> , PF <sub>6</sub> ).....                                        | 37 |
| UV-Vis, CD, and CPL data of <b>Λ/Δ-[2a]Cl</b> in the presence of <b>1a</b> .....                                        | 38 |
| CD and CPL data of <b>Λ/Δ-[2a]NO<sub>3</sub></b> in the presence of <b>1a</b> .....                                     | 39 |
| CD and CPL data of <b>Λ/Δ-[2a]PF<sub>6</sub></b> in the presence of <b>1a</b> .....                                     | 39 |
| CD and CPL data of <b>Λ/Δ-[2b]Cl</b> in the presence of <b>1a</b> .....                                                 | 40 |
| Frontier orbitals of a Ir complex cation.....                                                                           | 41 |
| Proposed mechanism of the symmetry-breaking effect .....                                                                | 41 |
| • <b>Supplementary References</b> .....                                                                                 | 42 |



## **Materials**

The components, resorcin[4]arene **1a** and **1c**, racemic and non-racemic coordination complexes were prepared according to literature methods and purified by recrystallization before usage.<sup>1-4</sup> Other commercially available compounds were used as received without further purification.

### **Synthetic procedure of the components**

**Synthesis of resorcin[4]arene 1a.** Resorcin[4]arene **1a** was synthesized according to the previously reported procedure.<sup>1</sup> Resorcinol (2.00 g, 18.2 mmol) was dissolved in EtOH (12 mL) and 3.6 mL of conc.-HCl (37%) was added to the solution. The solution was carefully degassed with N<sub>2</sub> bubbling for 5 min. EtOH solution (10 mL) of dodecanal (3.35 g, 18.2 mmol) was added dropwise to the solution over a 20-min period with stirring at 0 °C under N<sub>2</sub> atmosphere. The colorless solution was allowed to warm to room temperature. The solution was gradually heated and stirred at 80 °C for 14 h under N<sub>2</sub> atmosphere. During the reaction, the solution turned red and some precipitate appeared. After the reaction completed, the reaction mixture was cooled to room temperature and pored into H<sub>2</sub>O (50 mL) to give yellow precipitate. The solid was collected by filtration, washed with cold 50% EtOH-H<sub>2</sub>O solution and dried in vacuo. Crude product **1a** was obtained as a pale yellow solid (3.87 g), which was purified by recrystallization from acetone-H<sub>2</sub>O solution. Resorcin[4]arene **1a** was isolated as a colorless platelet crystals (40% isolated yield).

**Synthesis of resorcin[4]arene 1c.** Resorcin[4]arene **1c** was obtained in a similar procedure of **1a** with isovaleraldehyde instead of dodecanal. Resorcin[4]arene **1c** was purified by recrystallization from Et<sub>2</sub>O solution of the crude **1c** and isolated as a colorless platelet crystals (32% isolated yield).

**Synthesis of racemic Ir complex salts [2a]X (X = Cl, NO<sub>3</sub>, and PF<sub>6</sub>).** Racemic Ir complex salts [2]Cl were synthesized according to a previously reported procedure.<sup>2</sup> IrCl<sub>3</sub>·3H<sub>2</sub>O (150 mg, 0.06 mmol) and 2-phenylpyridine (150 mg, 0.12 mmol) were combined in a mixture of 2-ethoxyethanol (10 mL) and water (10 mL). The mixture was stirred at 120 °C for 24 h under N<sub>2</sub> atmosphere to provide a yellow solution. After the solution was cooled to room temperature, the precipitate was collected by filtration and washed with water and hexane. The dinuclear bis-cyclometalated Ir(III) precursor complex, [Ir<sub>2</sub>(ppy)<sub>4</sub>(μ-Cl)<sub>2</sub>], was obtained in a yield of 150 mg. The dinuclear Ir complex (107 mg, 0.10 mmol) and 4,4'-di-*tert*-butyl-2,2'-bipyridine (59.1 mg, 0.22 mmol) were dissolved in a mixture of CH<sub>2</sub>Cl<sub>2</sub> (10 mL) and MeOH (10 mL). After the mixture was heated at 50 °C for 5 h under N<sub>2</sub>, yellow solid was obtained by addition of Et<sub>2</sub>O into the solution. Racemic Ir complex salt [2a]Cl was purified by recrystallization from CH<sub>2</sub>Cl<sub>2</sub>-hexane solution (85% isolated yield). The NO<sub>3</sub> and PF<sub>6</sub> salts were obtained by the reaction of the Cl salt with AgNO<sub>3</sub> and AgPF<sub>6</sub>, respectively.

**Synthesis of racemic Ir complex salt [2b]Cl.** Racemic Ir complex salt [2b]Cl was obtained in a similar procedure as described for [2a]Cl with 4,4'-dimethyl-2,2'-bipyridine instead of 4,4'-di-*tert*-butyl-2,2'-bipyridine. Racemic Ir complex salt [2b]Cl was purified by recrystallization from CH<sub>2</sub>Cl<sub>2</sub>-hexane solution (90% isolated yield).

**Synthesis of racemic Ir complex salt [2c]Cl.** Racemic Ir complex salt [2c]Cl was obtained in a similar procedure as described for [2a]Cl with 4,4'-diphenyl-2,2'-bipyridine instead of 4,4'-di-*tert*-butyl-2,2'-bipyridine. Racemic Ir complex salt [2c]Cl was purified by recrystallization from

CH<sub>2</sub>Cl<sub>2</sub>-hexane solution (94% isolated yield).

**Synthesis of non-racemic Ir complex salt [2]Cl.** The preparation of the chiral auxiliary ligand and the optical resolution of the chiral Ir complexes were performed according to the literature (Supplementary Fig. 1).<sup>3</sup> The dinuclear Ir precursor complex [Ir<sub>2</sub>(ppy)<sub>4</sub>(μ-Cl)<sub>2</sub>] (107 mg, 0.10 mmol), a chiral auxiliary ligand, (*S*)-2-(2'-hydroxyphenyl)-4-isopropyl-2-thiazoline (49.7 mg, 0.22 mmol) and Et<sub>3</sub>N (278 μL, 2.0 mmol) were dissolved in CH<sub>2</sub>Cl<sub>2</sub> (10 mL) and the mixture was heated at 40 °C for 6 h under N<sub>2</sub> atmosphere. After cooling to room temperature, the mixture was dried in vacuo to provide a yellow solid containing a mixture of Λ-(*S*)- and Δ-(*S*)-Ir complexes. The diastereomers were separated by standard silica-gel chromatography. The isolated diastereomer, Λ-(*S*)- and Δ-(*S*)-Ir complexes, were reacted with corresponding bpy ligands in MeOH in the presence of 5 equiv. of HCl to give enantiomerically pure Λ-[2]Cl and Δ-[2]Cl, respectively. The chiral Ir complex salts, Λ/Δ-[2a]Cl and Λ/Δ-[2b]Cl, were purified by recrystallization from CHCl<sub>3</sub>-hexane and CH<sub>2</sub>Cl<sub>2</sub>-hexane solutions, respectively.

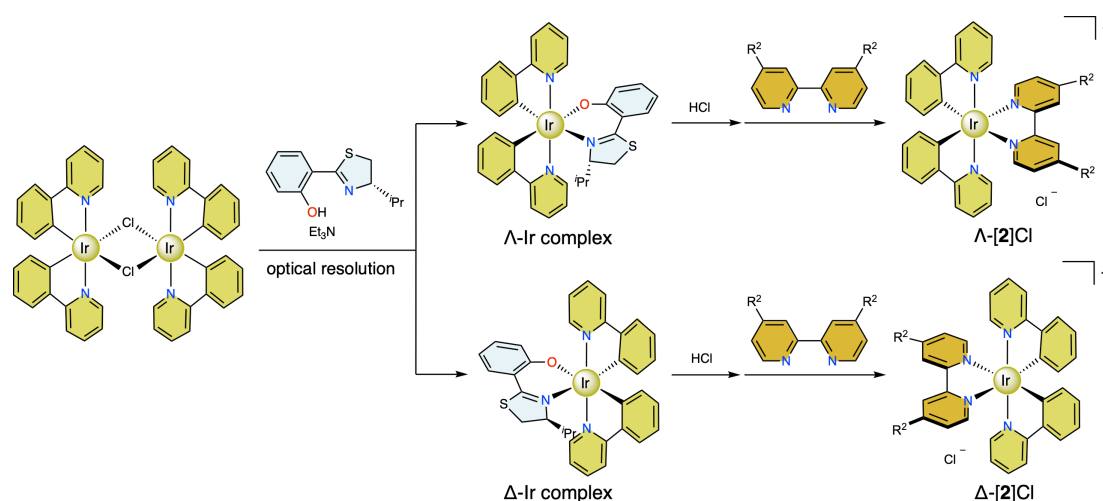

**Supplementary Fig. 1** Schematic representation of auxiliary-mediated synthesis of enantiomerically pure Λ- and Δ- Ir complex salts.

**Synthesis of racemic Ru complex salt [3a]Cl<sub>2</sub>.** Racemic Ru complex salt [3a]Cl<sub>2</sub> was synthesized according to an established method of similar Ru complexes.<sup>4</sup> [Ru(bpy)<sub>2</sub>Cl<sub>2</sub>] (96.8 mg, 0.20 mmol) and 4,4'-di-*tert*-butyl-2,2'-bipyridine (59.1 mg, 0.22 mmol) were dissolved in a mixture of ethanol (5 mL) and water (5 mL), and the solution was refluxed under N<sub>2</sub> atmosphere for 12 h. The reaction mixture was cooled to room temperature and the solvents were removed by evaporation. The solid was collected and purified by recrystallization from MeOH/Et<sub>2</sub>O solution (62% isolated yield).

**Synthesis of racemic Ru complex salt [3b]Cl<sub>2</sub>.** Racemic Ru complex salt [3b]Cl<sub>2</sub> was synthesized in a similar procedure of [3a]Cl<sub>2</sub> with 4,4'-dimethyl-2,2'-bipyridine instead of 4,4'-di-*tert*-butyl-2,2'-bipyridine. Racemic Ru complex salt [3b]Cl<sub>2</sub> was purified by recrystallization from MeOH/Et<sub>2</sub>O solution (56% isolated yield).

## General procedure for encapsulation experiments

To a wet chloroform solution (0.5 mL) of resorcin[4]arene **1** (6.6  $\mu\text{mol}$ ) was added Ir complex salt **[2]X** or Ru complex salt **[3]X<sub>2</sub>** (1.0  $\mu\text{mol}$ ). After the mixture was heated at 50 °C for 1 h in the dark, formation of inclusion complexes **(1)<sub>6</sub>⊃([2]X)** and **(1)<sub>6</sub>⊃([3]X<sub>2</sub>)** were confirmed by NMR spectroscopy.

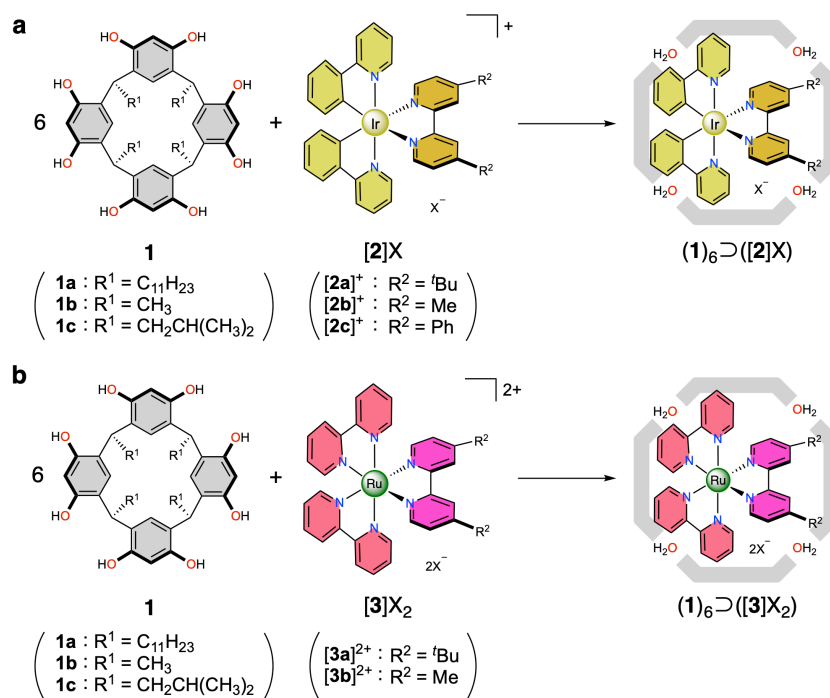

**Supplementary Fig. 2** Schematic representation of encapsulation of **a** Ir complex **[2]X** ( $X = \text{Cl}, \text{NO}_3, \text{PF}_6$ ), and **b** Ru complex **[3]X<sub>2</sub>** ( $X = \text{Cl}$ ) within the resorcin[4]arene capsule.

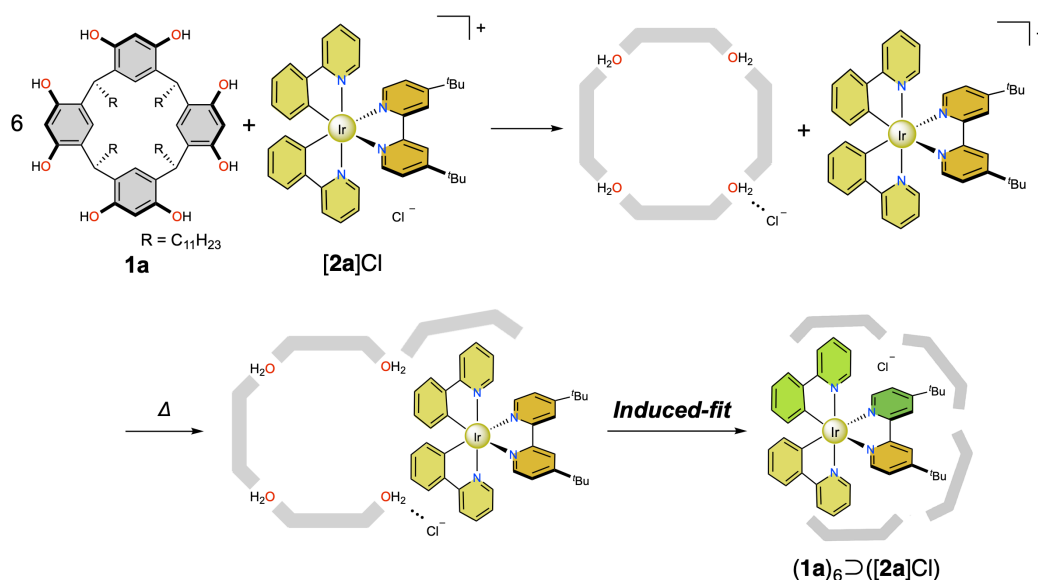

**Supplementary Fig. 3** Plausible self-assembly and encapsulation mechanism of **(1a)<sub>6</sub>⊃([2a]Cl)**. After mixing the solutions of **1a** and **[2a]Cl**, the hexameric capsule initially captures a Cl<sup>-</sup> anion via hydrogen bonding to a water molecule in the capsule framework to afford a mixture of anionic capsule and free Ir complex cation. Heating accelerates partial dissociation of a resorcin[4]arene monomer from the capsule.<sup>5</sup> The Ir complex cation is accommodated through the window of the capsule. As the size and shape of the guest is not adapted within the cavity of the symmetric hexameric capsule, a large structural change of the host framework occurs to give the distorted hexameric capsule around the Ir complex cation.

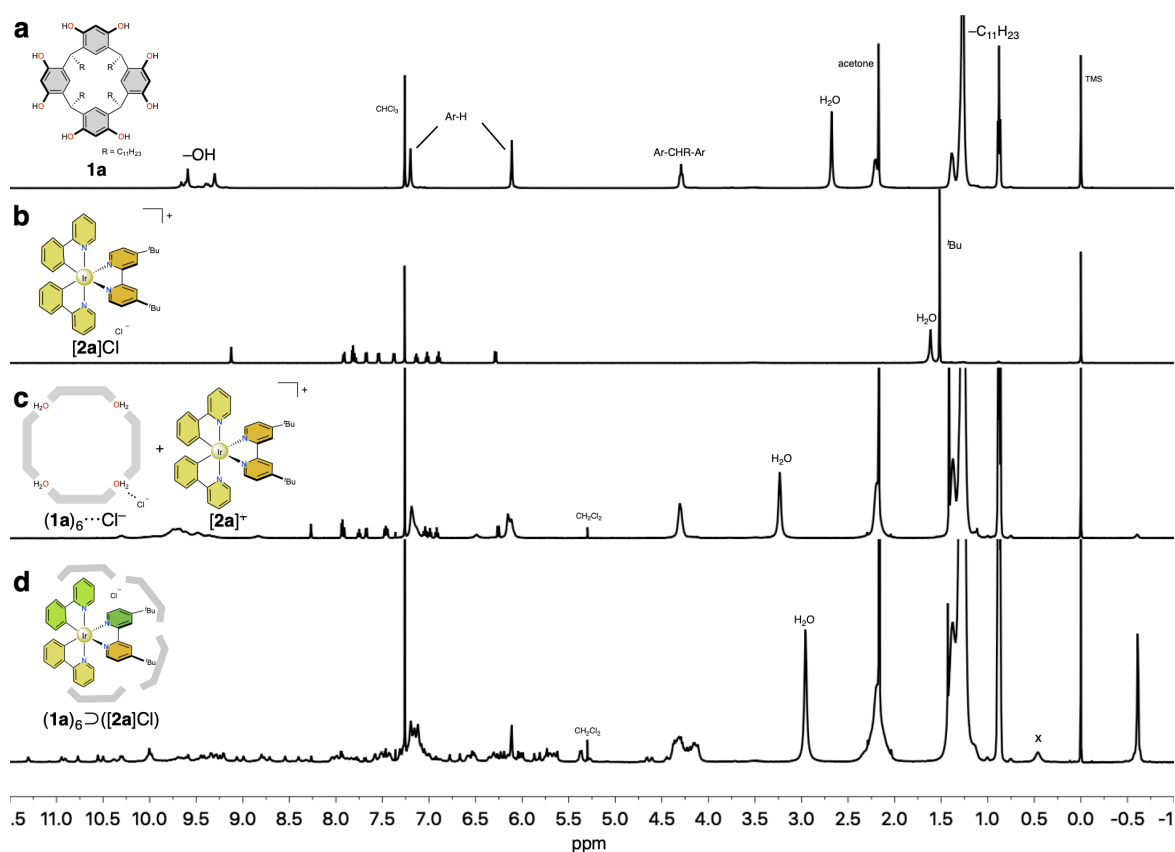

**Supplementary Fig. 4**  $^1\text{H}$  NMR spectra (500 MHz,  $\text{CDCl}_3$ , r.t.) of **a** resorcin[4]arene **1a**, **b** Ir complex **[2a]Cl**, **c** a mixture of  $(\mathbf{1a})_6$  and  $[\mathbf{2a}]\text{Cl}$ , and **d** the mixture after heating at 50 °C for 1 h.

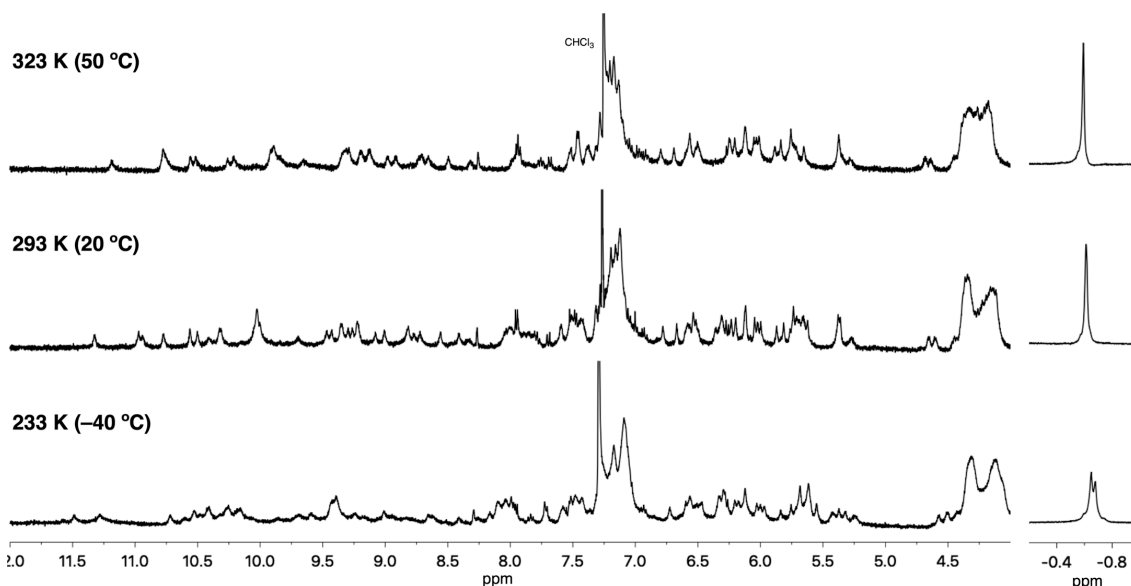

**Supplementary Fig. 5** Variable temperature (VT)  $^1\text{H}$  NMR spectra (400 MHz,  $\text{CDCl}_3$ ) of  $(\mathbf{1a})_6$  and  $[\mathbf{2a}]\text{Cl}$ . The NMR signals were still splitting even at 50 °C, suggesting that the symmetry-breaking structure is maintained in these conditions.

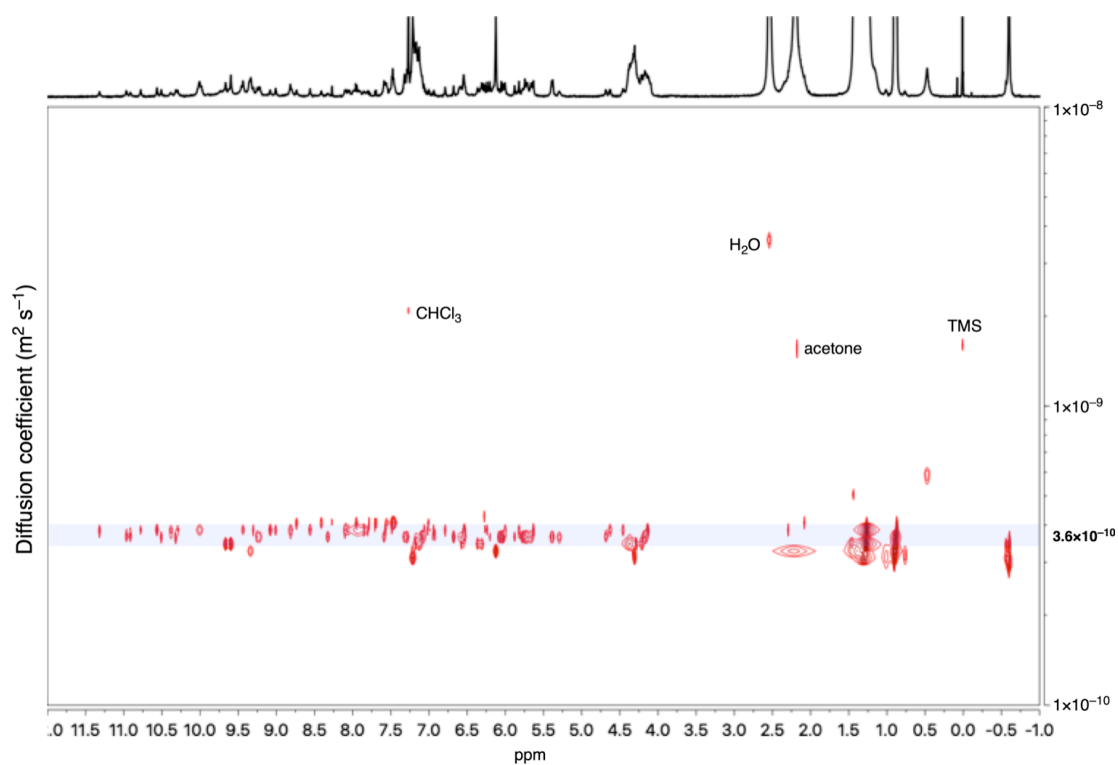

**Supplementary Fig. 6** DOSY NMR spectrum (500 MHz,  $\text{CDCl}_3$ , r.t.) of  $(\mathbf{1a})_6\supset([\mathbf{2a}]\text{Cl})$ .

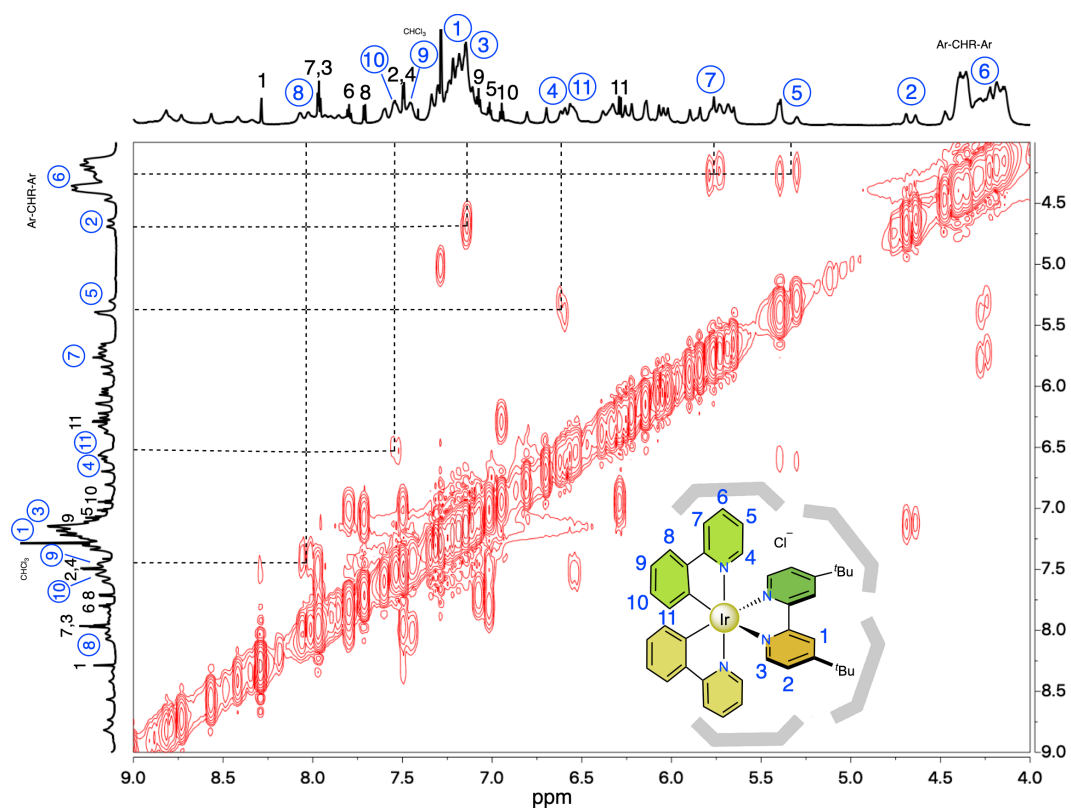

**Supplementary Fig. 7**  $^1\text{H}$ - $^1\text{H}$  COSY spectrum ( $\text{CDCl}_3$ , r.t.) of  $(\mathbf{1a})_6\supset([\mathbf{2a}]\text{Cl})$ . The signals marked with black and blue encircled numbers were assigned to the protons of free  $[\mathbf{2a}]^+$  and encapsulated  $[\mathbf{2a}]^+$ , respectively.

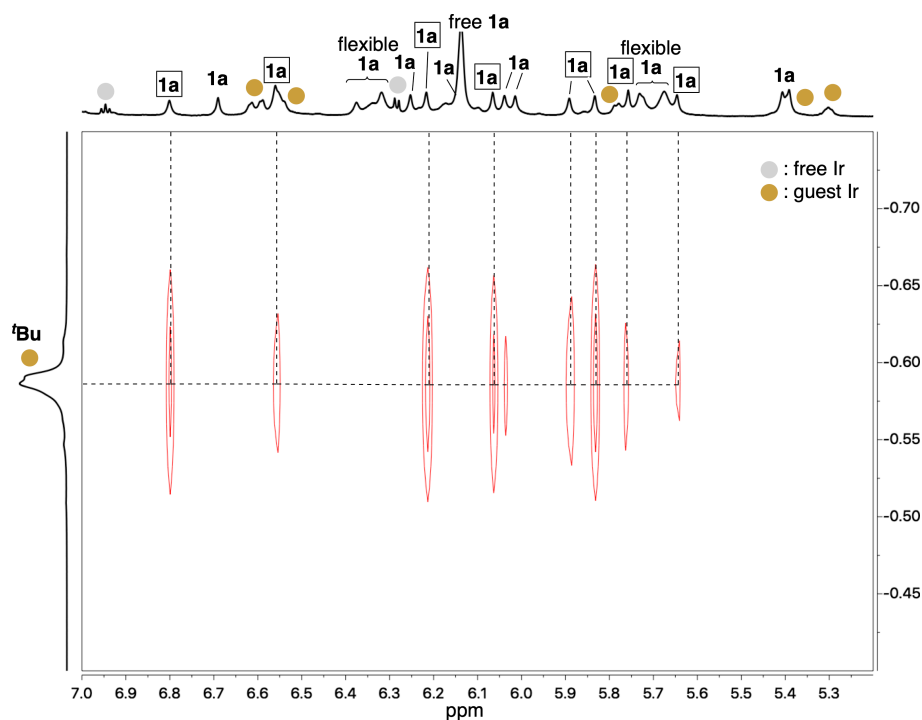

**Supplementary Fig. 8**  $^1\text{H}$ - $^1\text{H}$  NOESY spectrum ( $\text{CDCl}_3$ , r.t.) of  $(1\text{a})_6\supseteq([2\text{a}]\text{Cl})$ . Strong 8 cross peaks were observed between the  $^t\text{Bu}$  protons of encapsulated  $[2\text{a}]^+$  and aromatic protons of the distorted hexameric capsule, indicating that two resorcin[4]arene units were located around the  $^t\text{Bu}$  groups.

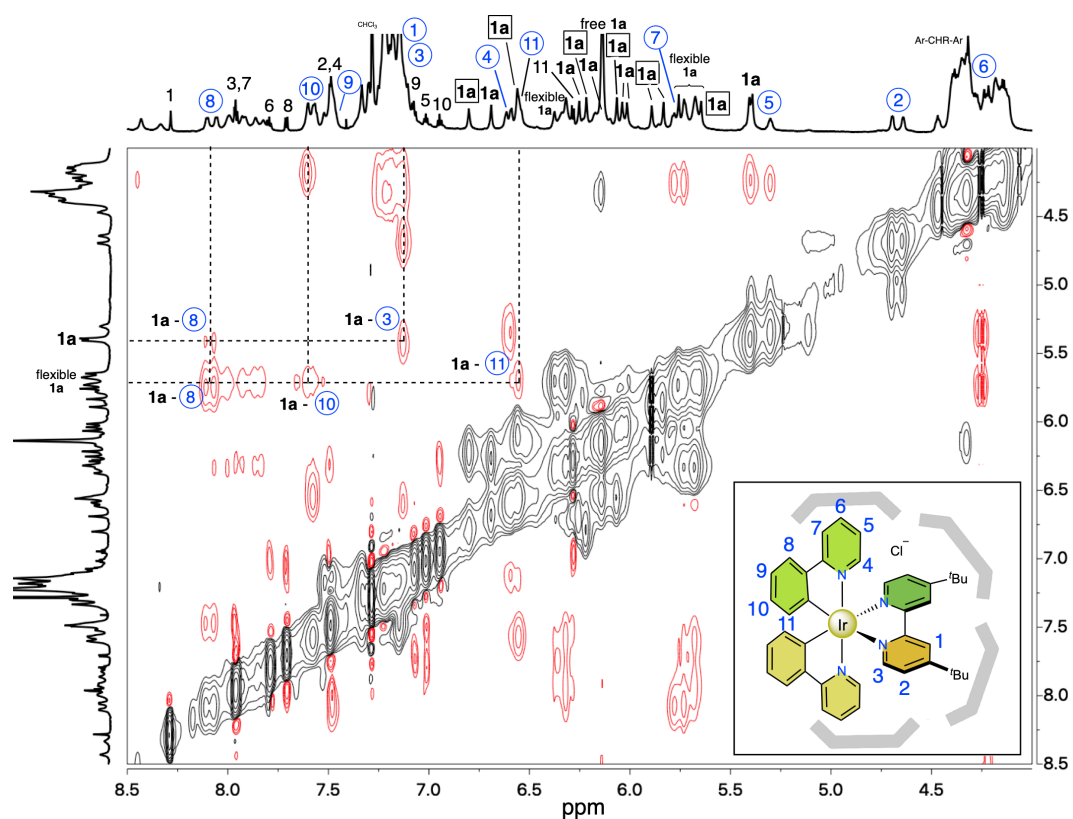

**Supplementary Fig. 9** ROESY spectrum (800 MHz,  $\text{CDCl}_3$ , 25 °C) of  $(1\text{a})_6\supseteq([2\text{a}]\text{Cl})$ . The black and blue encircled numbers were assigned to the protons of free and encapsulated  $[2\text{a}]^+$ , respectively. The signals of resorcin[4]arenes showing strong NOE with the  $^t\text{Bu}$  proton of  $[2\text{a}]^+$  were marked in a square.

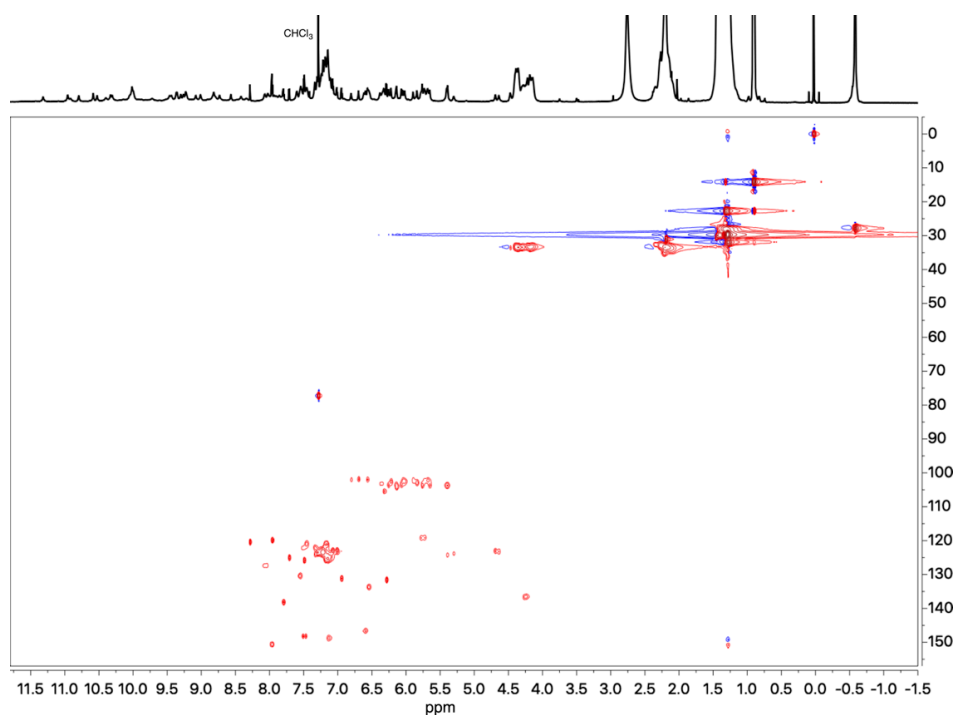

**Supplementary Fig. 10**  $^1\text{H}$ - $^{13}\text{C}$  HSQC spectrum ( $\text{CDCl}_3$ , r.t.) of  $(\mathbf{1a})_6\supset([\mathbf{2a}]\text{Cl})$ .

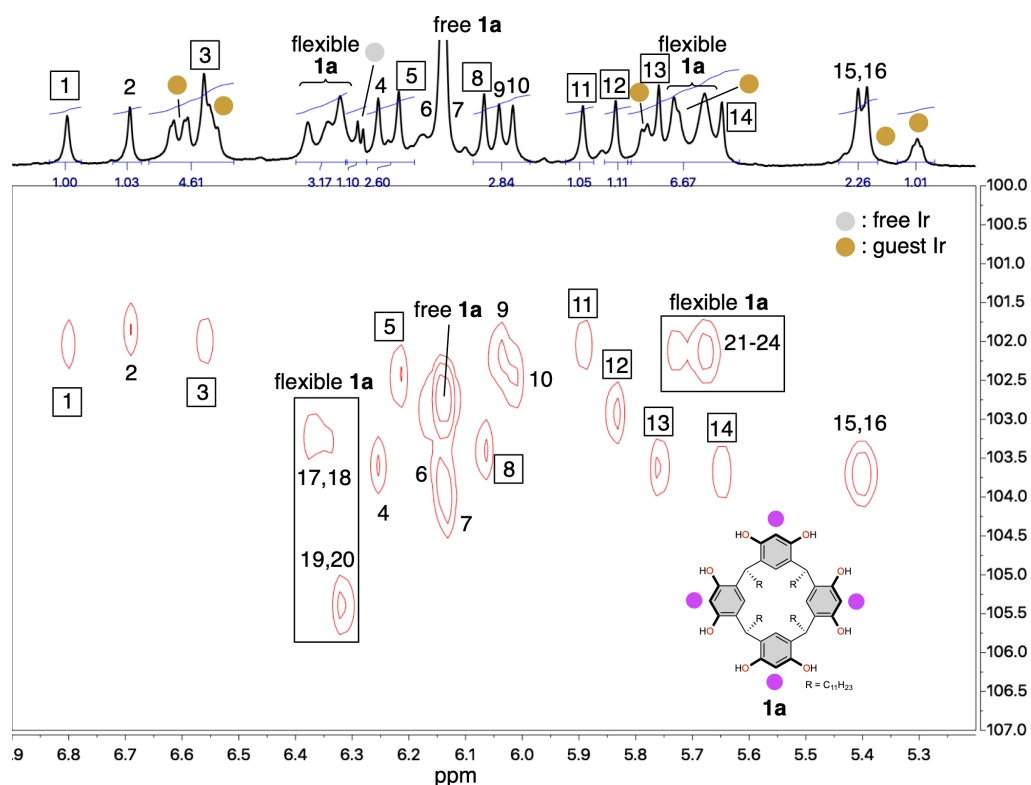

**Supplementary Fig. 11** Enlarged  $^1\text{H}$ - $^{13}\text{C}$  NMR spectrum ( $\text{CDCl}_3$ , 25 °C) around aromatic protons  $\mathbf{1a}$  in host-guest complex  $[(\mathbf{1a})_6\supset([\mathbf{2a}]\text{Cl})]$ . The 24 cross peaks derived from the resorcin[4]arene marked with the magenta filled circle (●) were observed. The signals of resorcin[4]arenes showing strong NOE with the  $^t\text{Bu}$  proton of encapsulated  $[\mathbf{2a}]^+$  were marked in a square. This result suggests that six resorcin[4]arene units formed a defined  $C_1$  symmetric hexameric capsule.

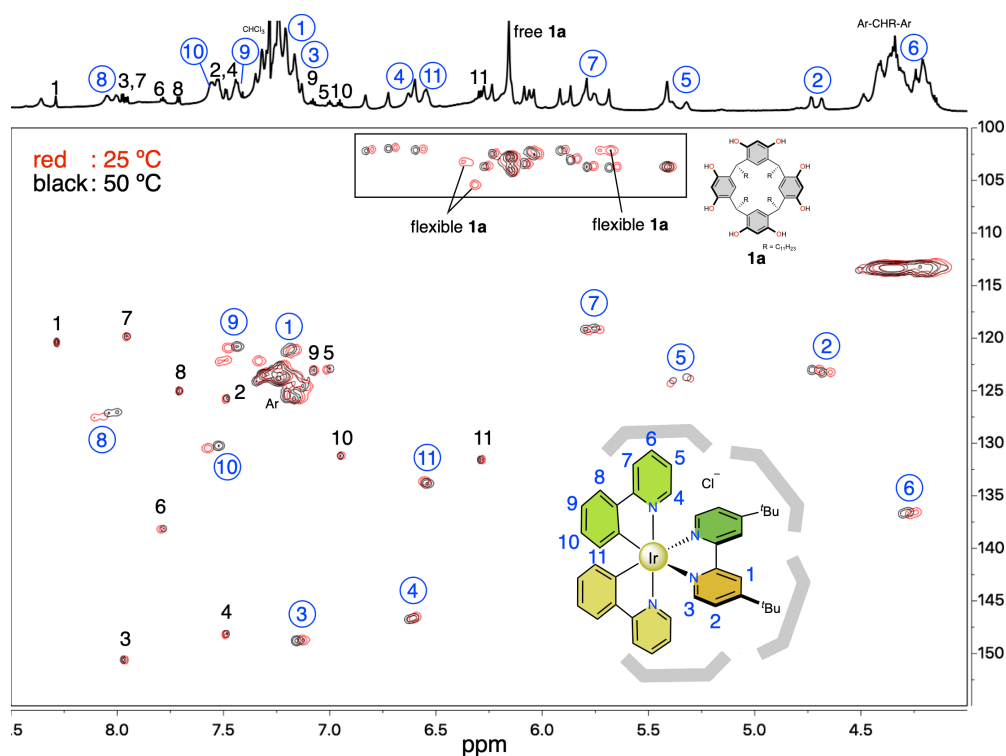

**Supplementary Fig. 12**  $^1\text{H}$ - $^{13}\text{C}$  HSQC spectrum of  $(\mathbf{1a})_6\supset([\mathbf{2a}]\text{Cl})$  recorded at 50 °C (black), superimposed with the spectrum at 25 °C (red). The cross peaks marked with black and blue encircled numbers were assigned to the protons of free  $[\mathbf{2a}]^+$  and encapsulated  $[\mathbf{2a}]^+$ , respectively. The broad peaks assigned to the flexible  $\mathbf{1a}$  disappeared at 50 °C, while other peaks were still sharp and slightly shifted. This result suggests that two in the distorted hexameric resorcin[4]arene capsule are relatively flexible around the Ir complex guest, compared with other four units.

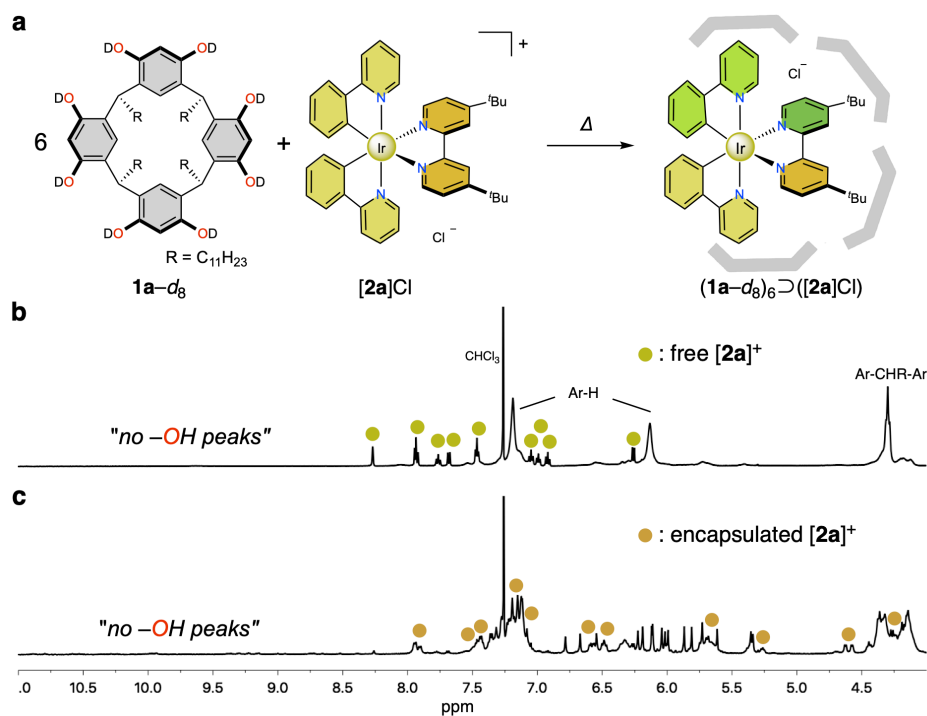

**Supplementary Fig. 13** a Schematic representation of the formation of  $(\mathbf{1a-d}_8)_6\supset([\mathbf{2a}]\text{Cl})$ . b, c  $^1\text{H}$  NMR spectra (500 MHz,  $\text{CDCl}_3$ , r.t.) of b a mixture of  $(\mathbf{1a-d}_8)_6$  and  $[\mathbf{2a}]\text{Cl}$ , and c the mixture after heating at 50 °C for 1 h.



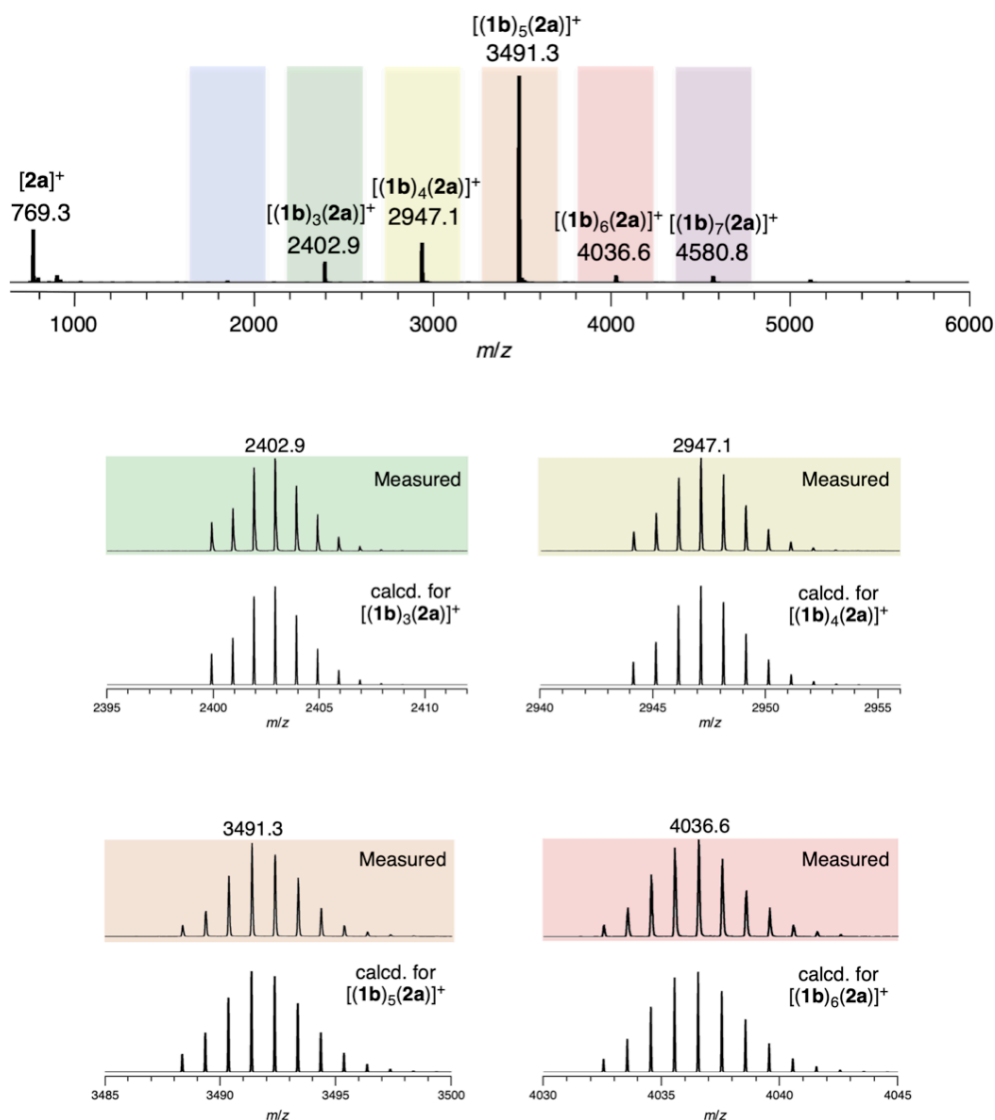

**Supplementary Fig. 14** ESI-MS spectra of a mixture of resorcin[4]arene **1b** ( $R^1 = \text{Me}$ ) and Ir complex salt **[2a]Cl** in  $\text{CHCl}_3/\text{acetone}$  (2:1, v/v). The most intense signal was observed at  $m/z$  3491.3, assigned to the host-guest complex in 5:1 stoichiometry. While this result seems inconsistent with the solution structure of stoichiometry  $(\mathbf{1a})_6 \supset ([\mathbf{2a}]\text{Cl})$ , the different environments the fragile assembly is exposed to can serve as explanation. In the mass spectrometry analysis, the water molecules joining the six resorcin[4]arene units via multiple hydrogen-bonds in solution are expelled during the gas-phase transfer into the vacuum system, as evident from the lack of water adducts. Therefore, the distorted hydrogen-bonded hexameric capsule can not be maintained and partial dissociation is promoted to a more compact complex in the ESI-MS study.

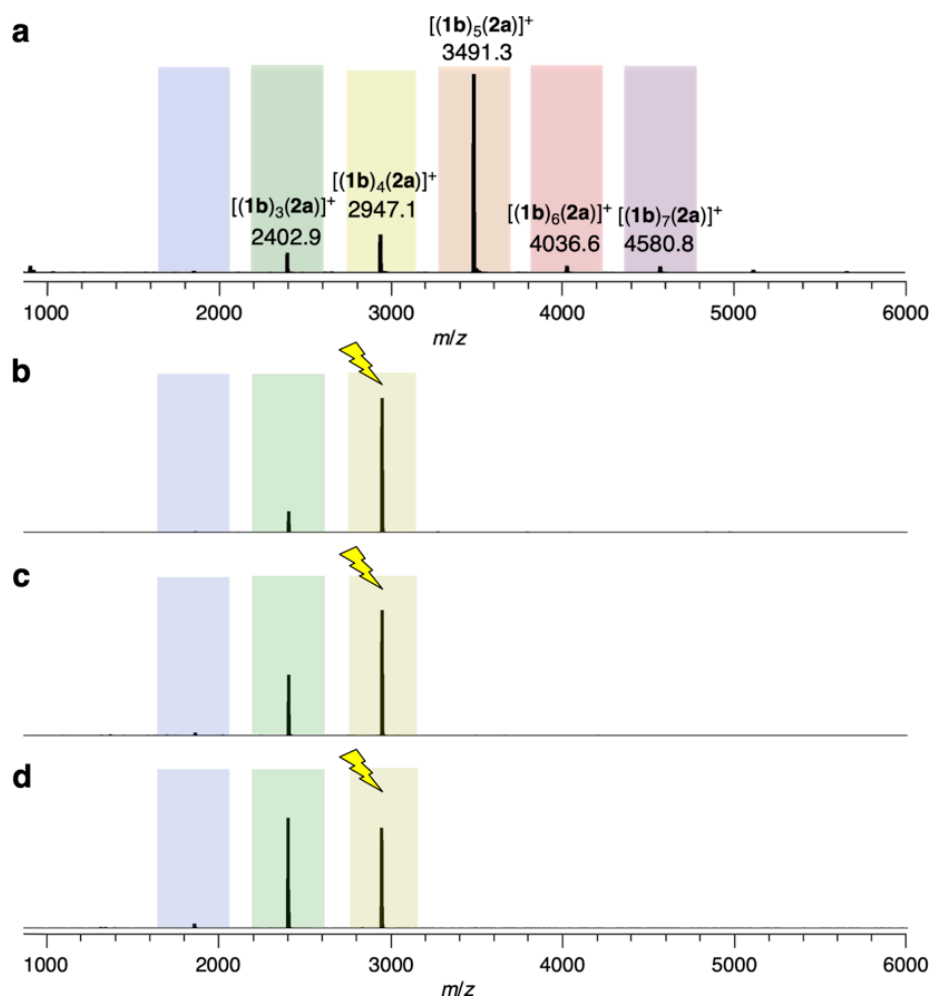

**Supplementary Fig. 15 a** ESI-MS spectra of a mixture of resorcin[4]arene **1b** ( $R^1 = \text{Me}$ ) and Ir complex salt **[2a]Cl** in  $\text{CHCl}_3/\text{acetone}$  (2:1, v/v). **b–d** ESI tandem mass spectra of  $[(1b)_4(2a)]^+$  ( $m/z$  : 2947.1) with the collision energy at **b** 10 eV, **c** 15 eV, and **d** 20 eV. Due to detection limit of the ESI-timsTOF mass spectrometer, the ESI tandem mass spectra were measured for  $[(1b)_4(2a)]^+$ . Higher collision energy promotes consecutive losses of a resorcin[4]arene unit from the parent ion.

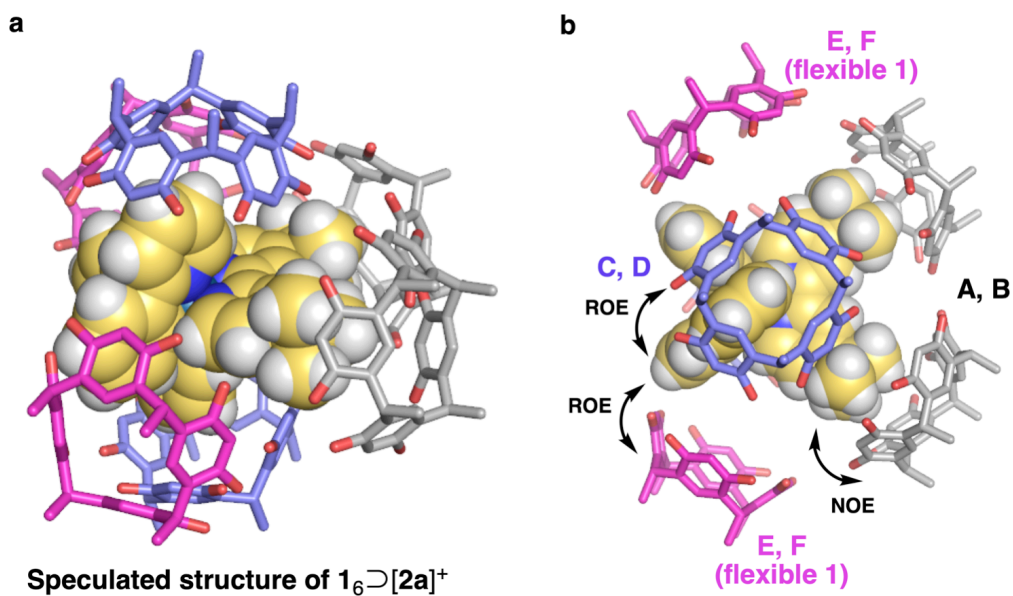

**Supplementary Fig. 16** A modeling structure of  $1_6\supset[2a]^+$ : **a** Front view, and **b** top view of the assembly, based on the 2D NMR results and X-ray structure of  $1c_3\supset[3a]^{2+}$ . As the solution structure of assembly still involves uncertainty, water molecules and counter anion in the assembly cannot be included in this model. Nevertheless, this model structure roughly shows a relative orientation of the guest and hosts in solution.

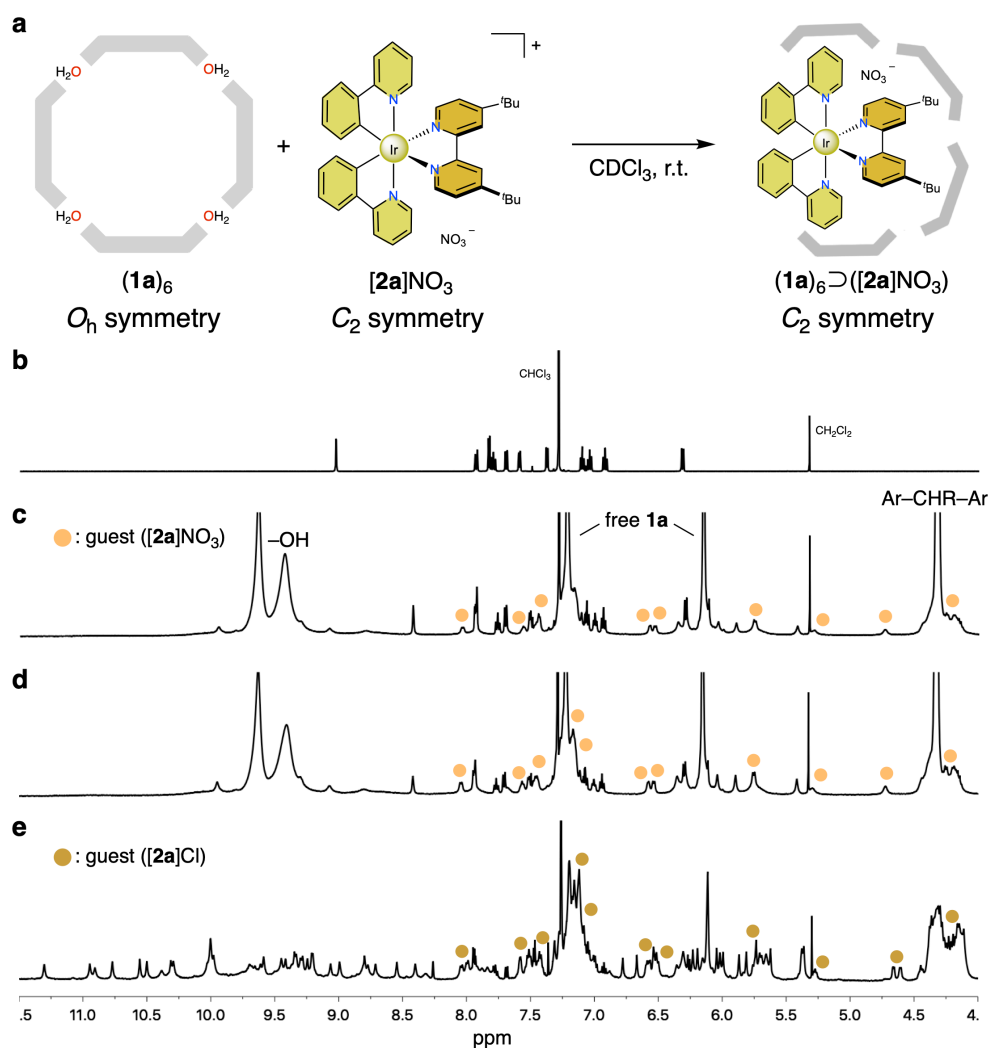

**Supplementary Fig. 17** **a** Schematic representation of the assembly of  $[2a]NO_3$ . **b–e**  $^1H$  NMR spectra (500 MHz,  $CDCl_3$ , r.t.) of **b** Ir complex  $[2a]NO_3$ , **c** a mixture of  $(1a)_6$  and  $[2a]NO_3$ , **d** a mixture after 1 h at 50 °C, and **e** the symmetry-breaking assembly  $(1a)_6 \supset ([2a]Cl)$ . The  $NO_3$  salt was encapsulated without heating the mixture to give symmetric host–guest complex  $(1a)_6 \supset ([2a]NO_3)$  in NMR time-scale. These results indicate that  $NO_3$  anion weakens the hydrogen-bond network of the hexameric capsule to increase flexibility of **1a**.

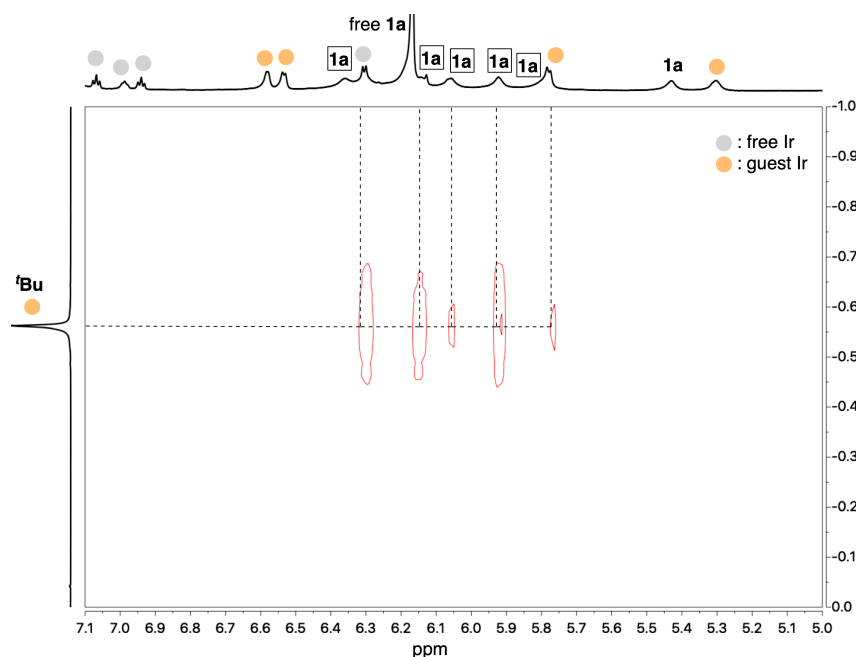

**Supplementary Fig. 18**  $^1\text{H}$ - $^1\text{H}$  NOESY spectrum ( $\text{CDCl}_3$ , r.t.) of  $(\mathbf{1a})_6\supset([\mathbf{2a}]\text{NO}_3)$ . Cross peaks were observed between the  $^t\text{Bu}$  protons of encapsulated  $[\mathbf{2a}]^+$  and aromatic protons of the distorted hexameric capsule.

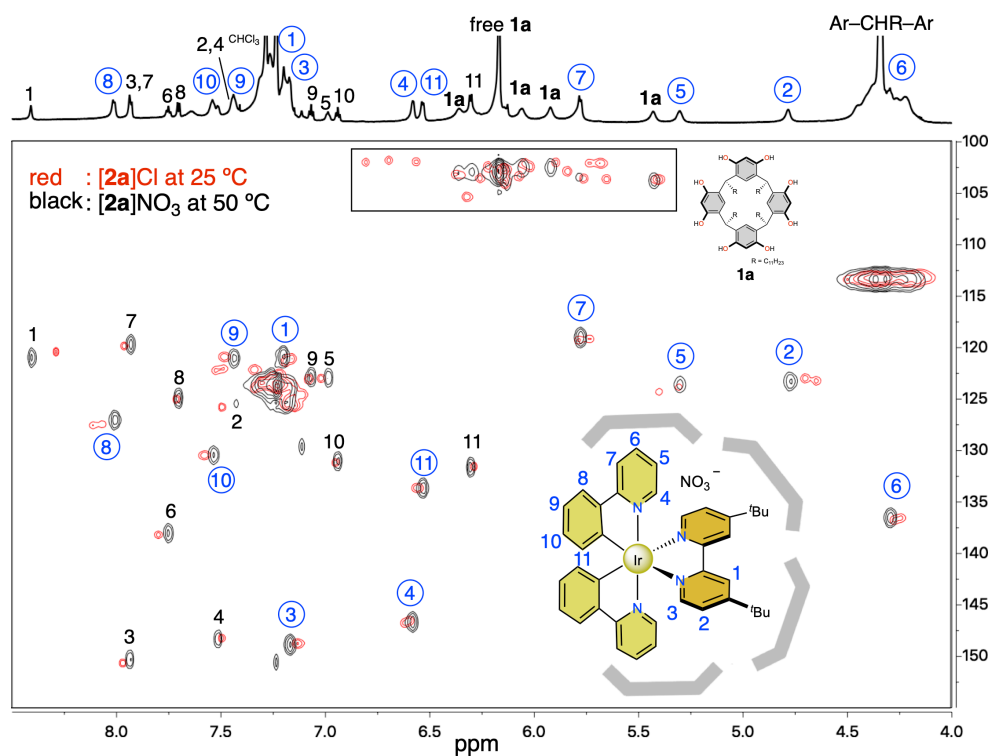

**Supplementary Fig. 19**  $^1\text{H}$ - $^{13}\text{C}$  HSQC spectrum of  $(\mathbf{1a})_6\supset([\mathbf{2a}]\text{NO}_3)$  recorded at 50 °C (black), superimposed with the spectrum of  $(\mathbf{1a})_6\supset([\mathbf{2a}]\text{Cl})$  at 25 °C (red). The cross peaks marked with black and blue encircled numbers were assigned to the protons of free  $[\mathbf{2a}]^+$  and encapsulated  $[\mathbf{2a}]^+$ , respectively. Similar chemical shifts of encapsulated  $[\mathbf{2a}]\text{NO}_3$  were observed to those of  $[\mathbf{2a}]\text{Cl}$ , indicating that both guest salts have similar configurations within the distorted hexameric capsule. In particular, the peak splitting pattern of the guests suggests that the  $C_2$  molecular symmetry of the guest was kept even after encapsulation on the NMR time-scale.

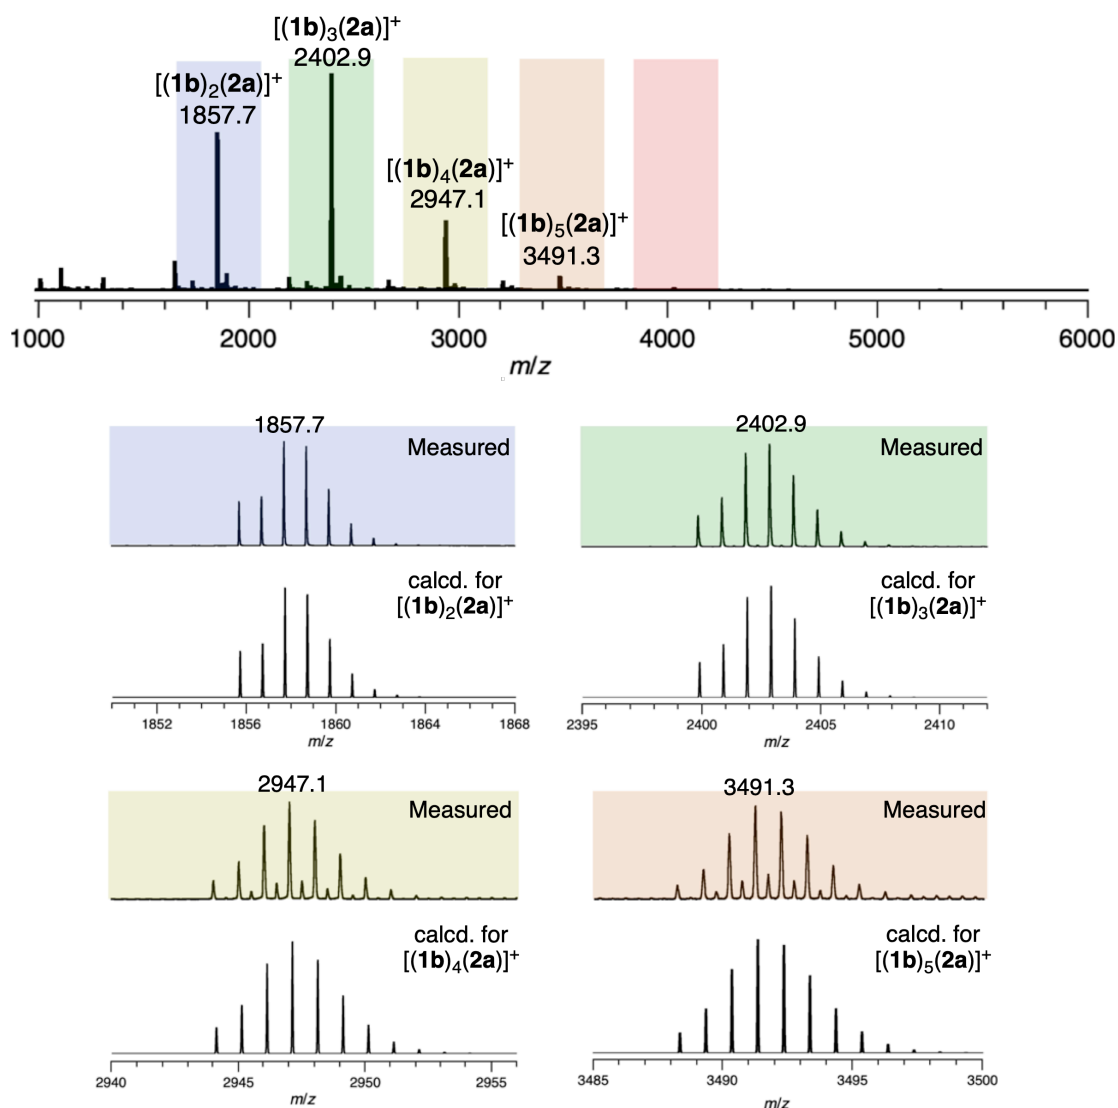

**Supplementary Fig. 20** ESI-MS spectra of a mixture of resorcin[4]arene **1b** ( $R^1 = \text{Me}$ ) and Ir complex salt  $[\mathbf{2b}]\text{NO}_3$  in  $\text{CHCl}_3/\text{acetone}$  (2:1, v/v). The effective template effect from the complex cation afforded supramolecular Ir complexes encapsulated by resorcin[4]arene oligomers in the gas-phase. However, the template effect of the  $\text{NO}_3$  salt is not strong enough to stabilize the larger assemblies in the gas-phase.

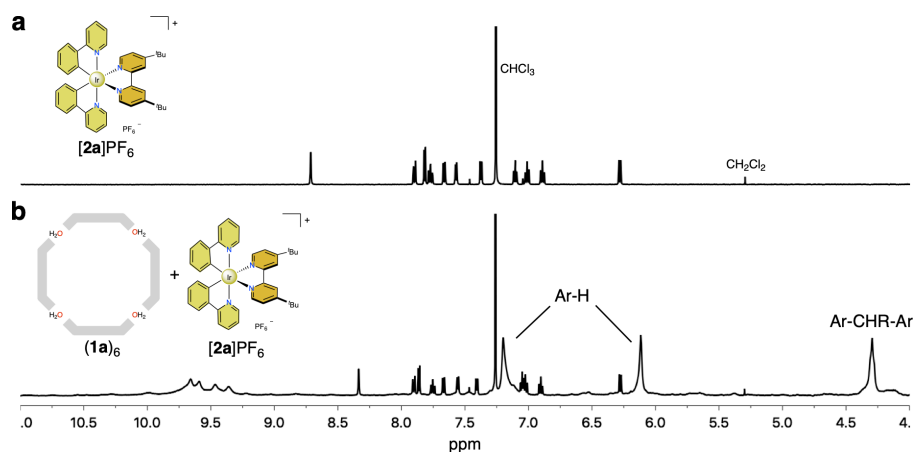

**Supplementary Fig. 21** Enlarged <sup>1</sup>H NMR spectra (500 MHz, CDCl<sub>3</sub>, r.t.) of **a** Ir complex [2a]PF<sub>6</sub>, and **b** a mixture of (1a)<sub>6</sub> and [2a]PF<sub>6</sub> after heating at 50 °C for 1 h. The signals of the mixture did not change after heating, indicating that Ir complex salt [2a]PF<sub>6</sub> was not encapsulated and that the nature of the counter anion plays an important role in the encapsulation process.

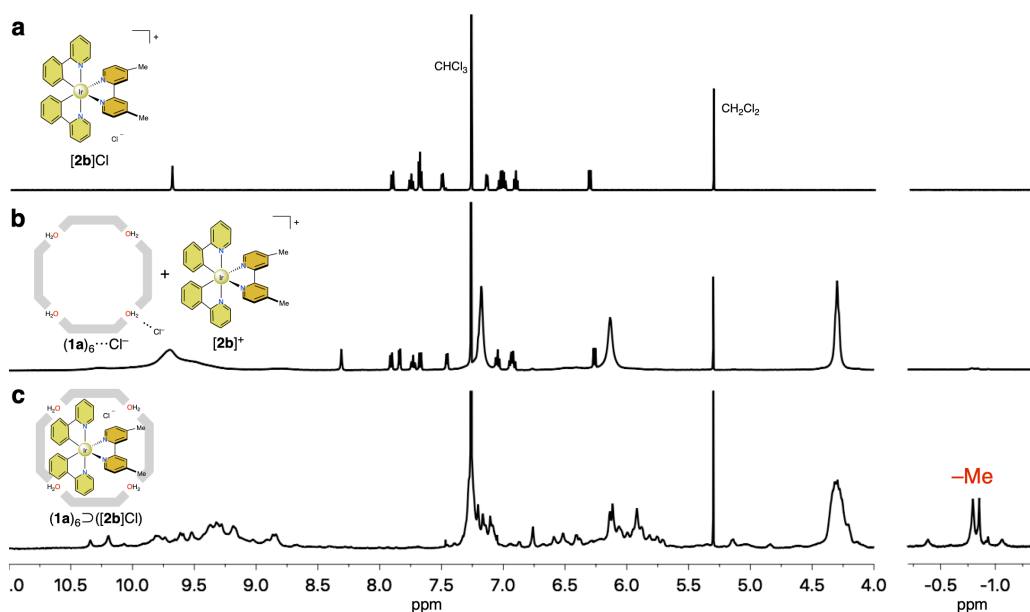

**Supplementary Fig. 22** <sup>1</sup>H NMR spectra (500 MHz, CDCl<sub>3</sub>, r.t.) of **a** Ir complex [2b]Cl, **b** a mixture of (1a)<sub>6</sub> and [2b]Cl, and **c** the mixture after heating at 50 °C for 1 h. The signals were broadened and shifted to up-field region after host-guest formation, indicating that the Ir complex salt was encapsulated within the resorcin[4]arene capsule.

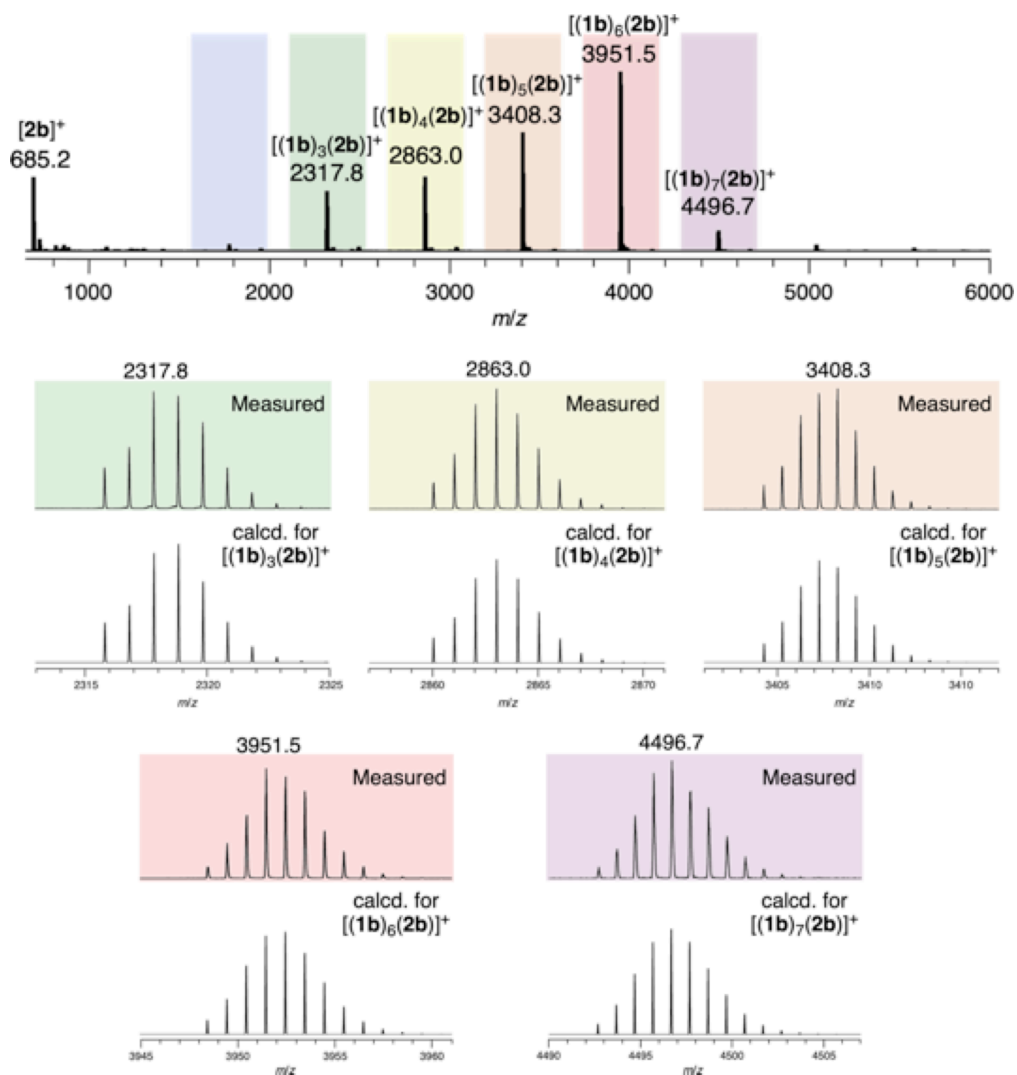

**Supplementary Fig. 23** ESI-MS spectra of a mixture of resorcin[4]arene **1b** (R<sup>1</sup> = Me) and Ir complex salt **[2b]Cl** in CHCl<sub>3</sub>/acetone (2:1, v/v). Effectively templated by the smaller complex cation, mainly large supramolecular assemblies of up to seven resorcin[4]arenes surrounding the Ir complex were observed in the gas-phase.



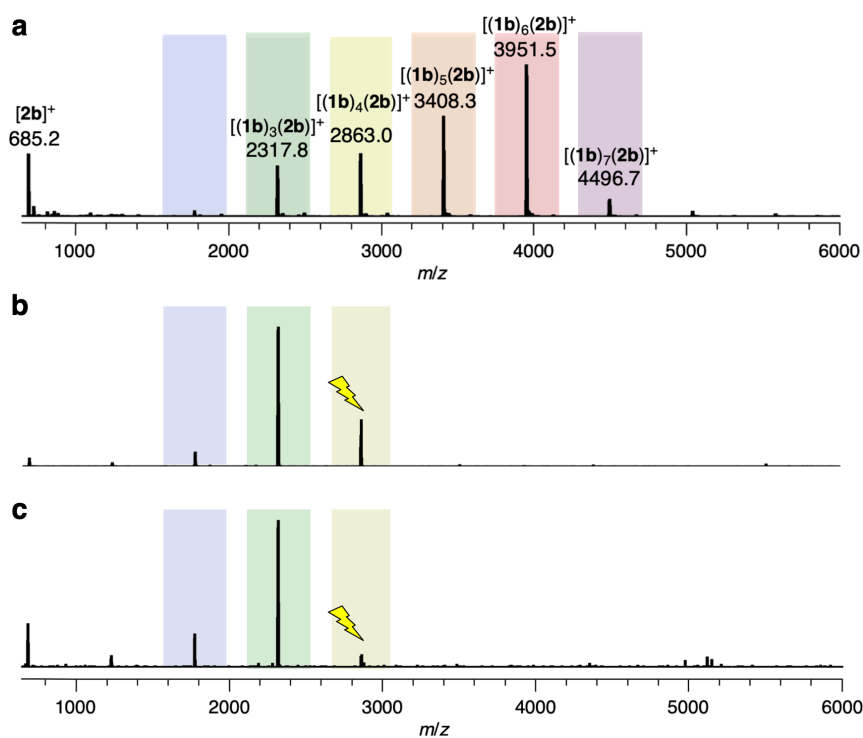

**Supplementary Fig. 24** a ESI-MS spectra of a mixture of resorcin[4]arene **1b** ( $R^1 = \text{Me}$ ) and Ir complex salt **[2b]Cl** in  $\text{CHCl}_3/\text{acetone}$  (2:1, v/v). **b–c** ESI tandem mass spectra of  $[(\mathbf{1b})_4(\mathbf{2b})]^+$  ( $m/z : 2863.0$ ) with the collision energy at **b** 1 eV, and **c** 10 eV. Due to detection limit of the ESI-timsTOF mass spectrometer, the ESI tandem mass spectra were measured for  $[(\mathbf{1b})_4(\mathbf{2b})]^+$ . Higher collision energy promotes consecutive monomer losses from the parent ion.

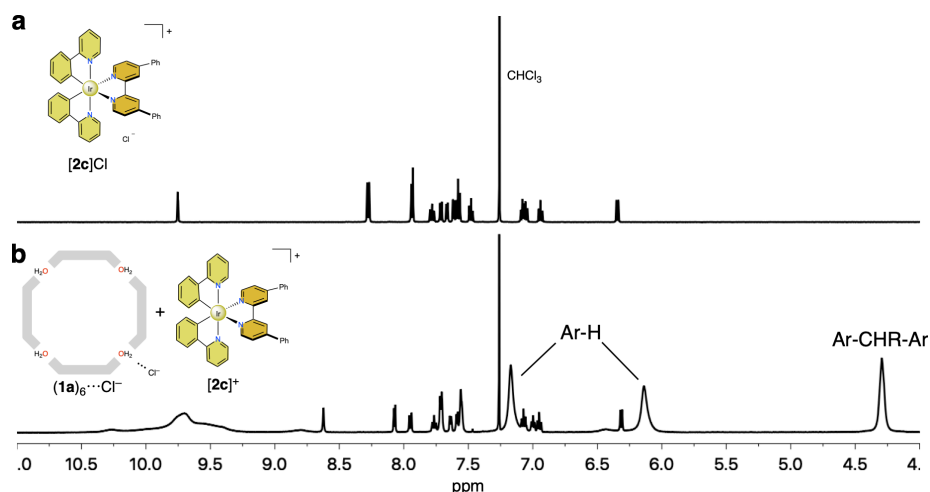

**Supplementary Fig. 25**  $^1\text{H}$  NMR spectra (500 MHz,  $\text{CDCl}_3$ , r.t.) of **a** Ir complex **[2c]Cl**, and **b** a mixture of **(1a)<sub>6</sub>** and **[2c]Cl** after heating at 50 °C for 1 h. The signals of the mixture did not change after heating, indicating that the very spacious Ir complex salt **[2c]Cl** was not encapsulated.

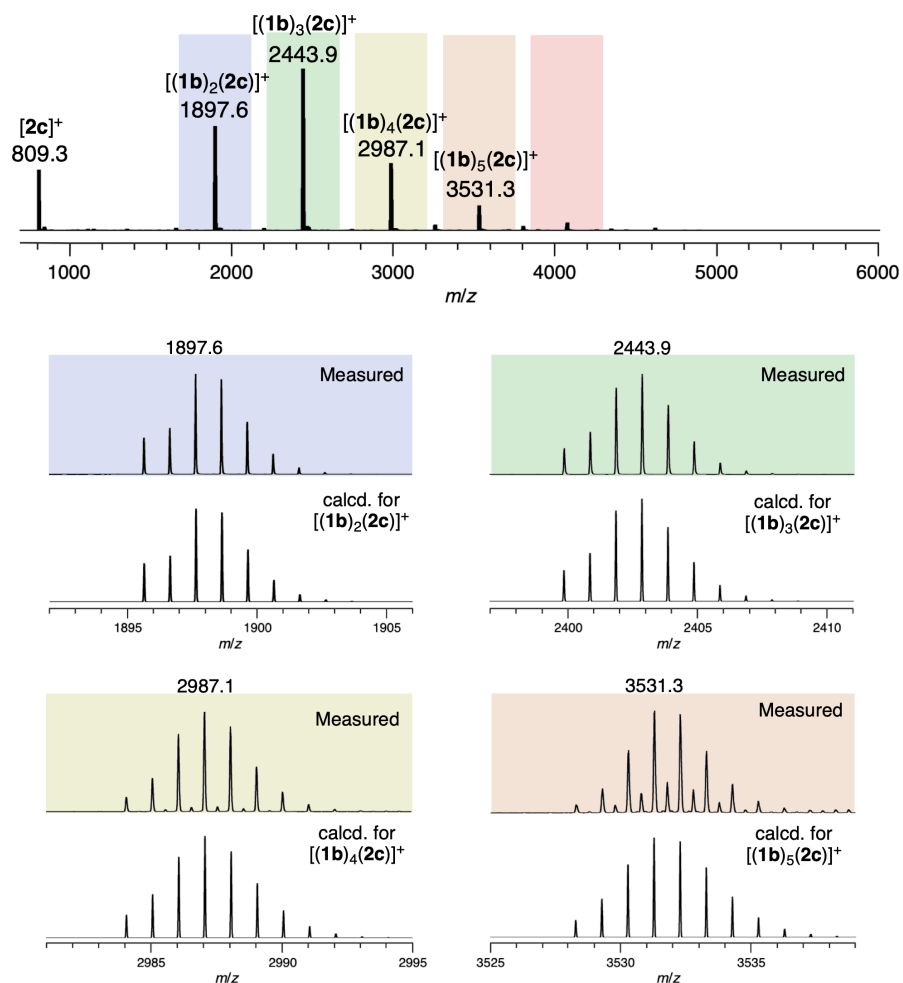

**Supplementary Fig. 26** ESI-MS spectra of a mixture of resorcin[4]arene **1b** ( $R^1 = \text{Me}$ ) and Ir complex salt **[2c]Cl** in  $\text{CHCl}_3/\text{acetone}$  (2:1, v/v). Although Ir complex salt **[2c]Cl** was not encapsulated within the resorcin[4]arene oligomer in solution, the effective template effect offered by the complex cation stabilizes a range of supramolecular assemblies between the Ir complex and resorcin[4]arene oligomers in the gas-phase. However, owing to the large size of the complex, exceeding the dimensions of the hexameric capsule, only smaller resorcin[4]arene oligomers were found to be stabilized.

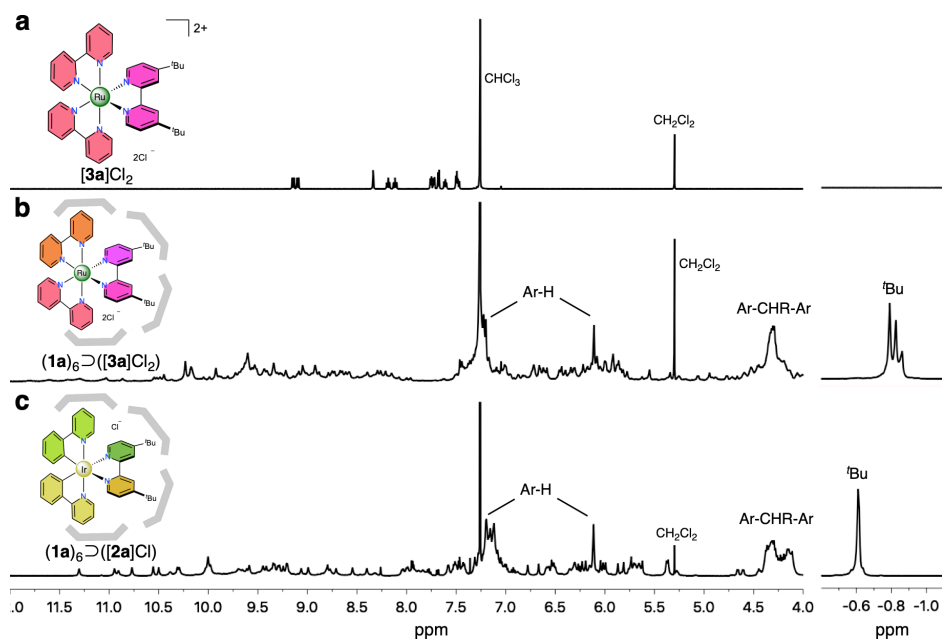

**Supplementary Fig. 27** <sup>1</sup>H NMR spectra (500 MHz,  $CDCl_3$ , r.t.) of **a**  $[3a]Cl_2$ , **b** a mixture of  $(1a)_6$  and  $[3a]Cl_2$  after heating at 50 °C for 1 h, and **c** symmetry-breaking assembly  $(1a)_6 \supset ([2a]Cl)$ . The <sup>1</sup>H NMR spectrum of the mixture of  $(1a)_6$  and  $[3a]Cl_2$  also showed splitting signals of the assembly, suggesting a formation of symmetry-breaking host-guest complex  $(1a)_6 \supset ([3a]Cl_2)$ . Notably, three <sup>t</sup>Bu signals derived from encapsulated  $[3a]^{2+}$  were observed at -0.8 ppm, presumably owing to slow rotation of <sup>t</sup>Bu groups within the capsule on the NMR time-scale or existence of host-guest complexes with different stoichiometry  $(1a)_n \supset ([3a]Cl_2)$  ( $n = 5-7$ ) in solution.

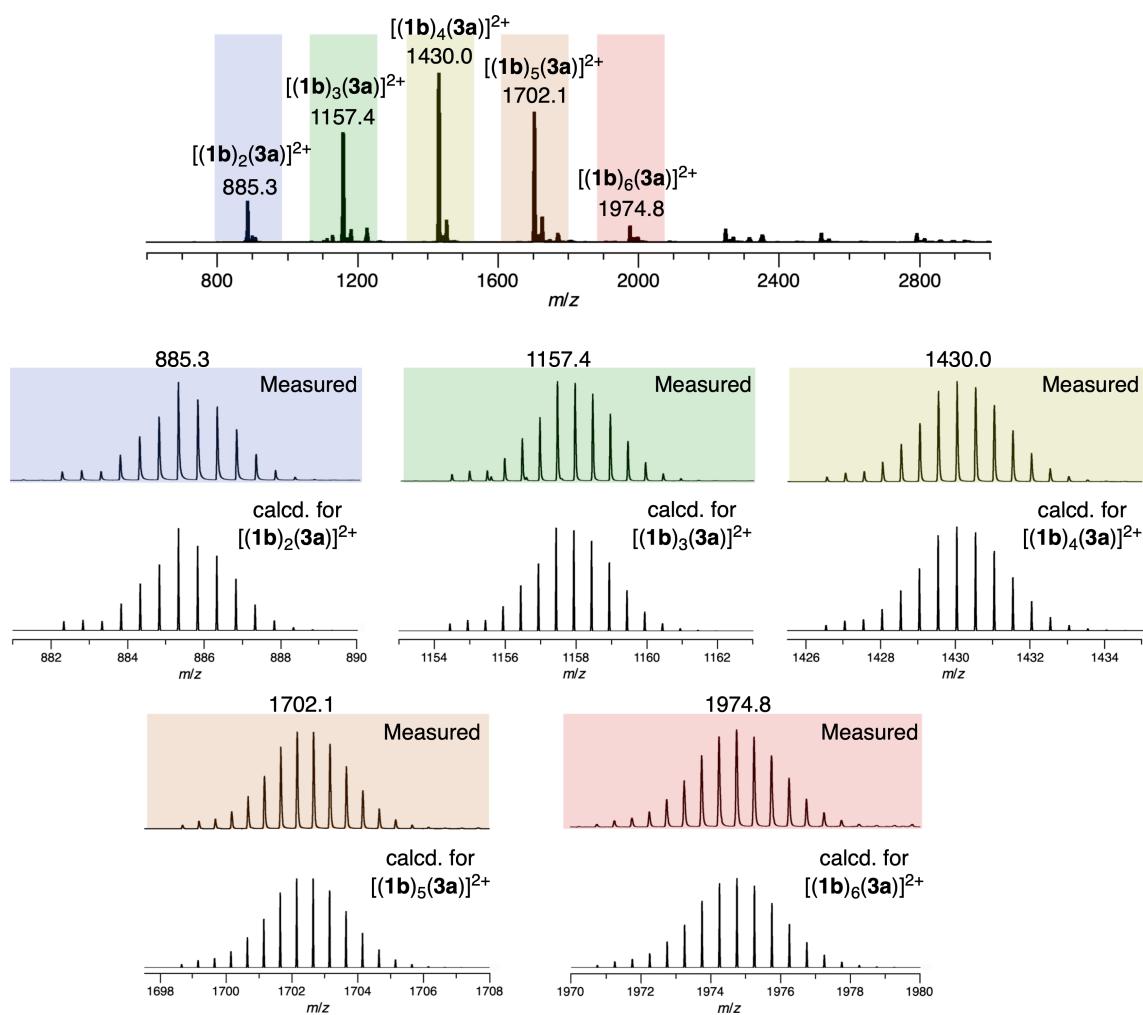

**Supplementary Fig. 28** ESI-MS spectra of a mixture of resorcin[4]arene **1b** ( $R^1 = \text{Me}$ ) and Ru complex salt **[3a]**Cl<sub>2</sub> in CHCl<sub>3</sub>/acetone (2:1, v/v). The effective template effect from the complex cation affords supramolecular Ru complexes encapsulated by resorcin[4]arene oligomers in the gas-phase.

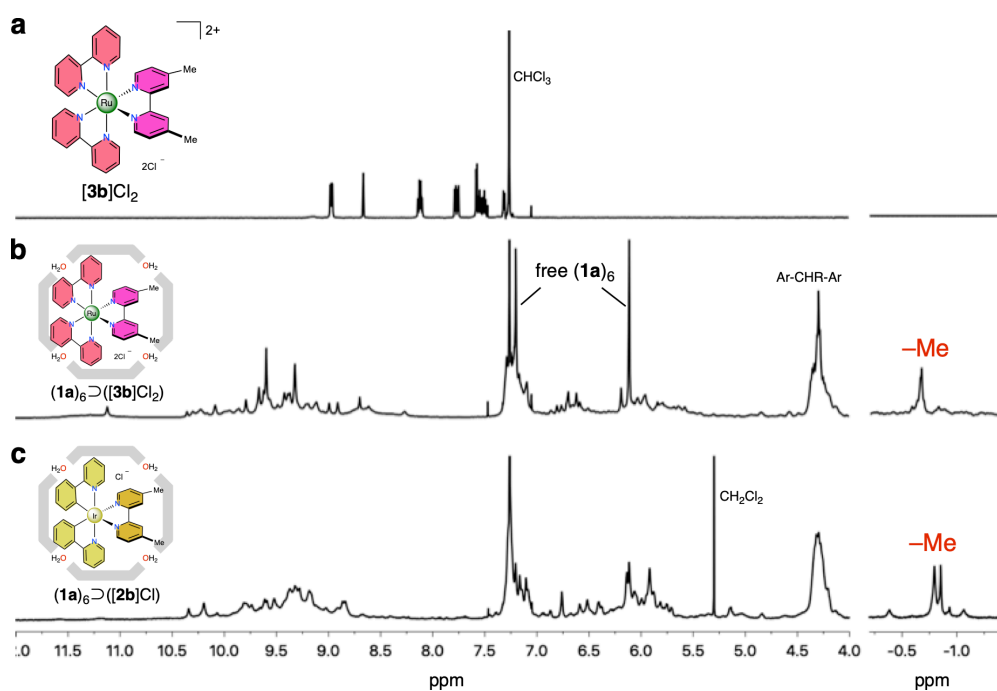

**Supplementary Fig. 29** <sup>1</sup>H NMR spectra (500 MHz, CDCl<sub>3</sub>, r.t.) of **a**  $[3b]Cl_2$ , **b** a mixture of  $(1a)_6$  and  $[3b]Cl_2$  after heating at 50 °C for 1 h, and **c** host-guest complex  $(1a)_6 \supset ([2b]Cl)$ . The signals were broadened and shifted to up-field region after host-guest formation, indicating that the Ru complex salt  $[3b]Cl_2$  was encapsulated within the hexameric capsule.

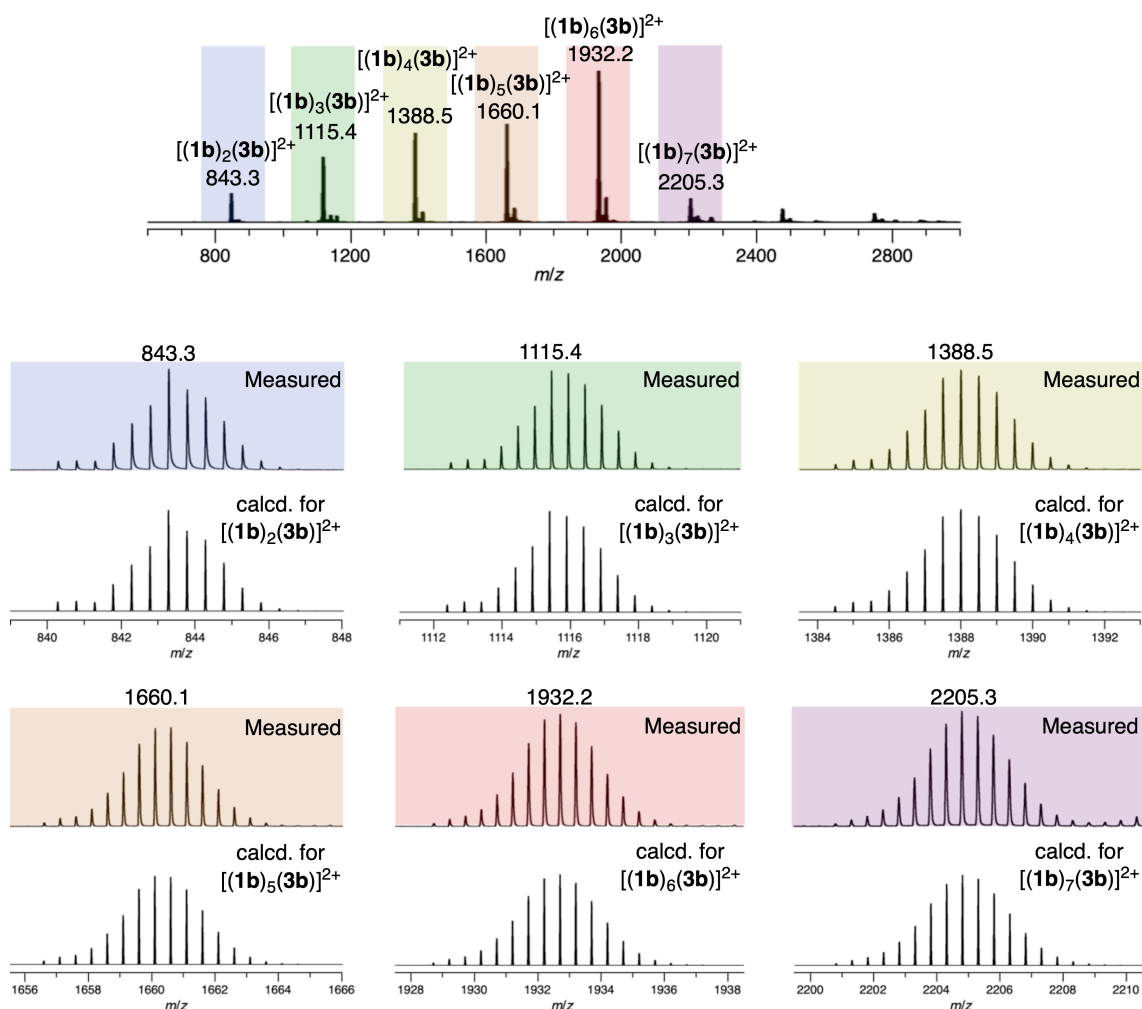

**Supplementary Fig. 30** ESI-MS spectra of a mixture of resorcin[4]arene **1b** ( $R^1 = \text{Me}$ ) and Ru complex salt **[3b]Cl<sub>2</sub>** in  $\text{CHCl}_3/\text{acetone}$  (2:1, v/v). The effective template effect from the complex cation affords supramolecular Ru complexes encapsulated by resorcin[4]arene oligomers in the gas-phase.

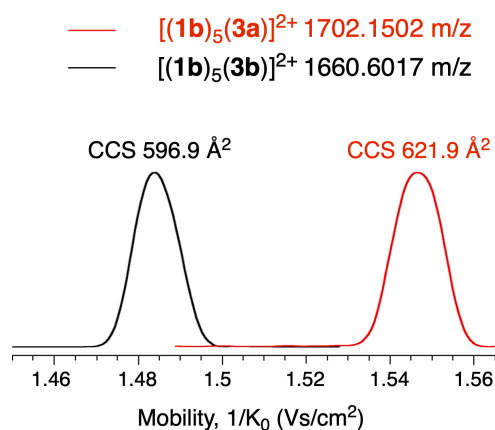

**Supplementary Fig. 31** Ion Mobility spectra of  $[(\mathbf{1b})_5(\mathbf{3a})]^{2+}$  and  $[(\mathbf{1b})_5(\mathbf{3b})]^{2+}$ . The collisional cross-section (CCS) of  $[(\mathbf{1b})_5(\mathbf{3a})]^{2+}$  is significantly larger than that of  $[(\mathbf{1b})_5(\mathbf{3b})]^{2+}$ , indicating that the sterically demanding  $t\text{Bu}$  groups in  $[\mathbf{3a}]^{2+}$  promote to form a larger structure than templated by  $[\mathbf{3b}]^{2+}$ .

## X-ray structural determination

Single crystals of  $(\mathbf{1c})_3\supset[\mathbf{3a}]\text{Cl}_2$  suitable for X-ray crystallographic analysis were obtained as red platelet crystals from the MeOH-H<sub>2</sub>O mixed solution (2:1, v/v) of resorcin[4]arene **1c** and ruthenium complex  $[\text{Ru}(\text{bpy})_2(\text{Bu}_2\text{bpy})]\text{Cl}_2$  ( $[\mathbf{3a}]\text{Cl}_2$ ). As the single crystals were highly fragile owing to solvent loss, coating a crystal with a protectant (FLUOROLUBE<sup>®</sup> oil) and mounting it onto X-ray diffractometer (Rigaku Saturn724) were needed to be manipulated quickly. X-ray diffraction data were collected at 93 K. The crystal structure was initially solved by direct method (SHELXS-97). The positional and thermal parameters of non-H atoms were refined anisotropically by the full-matrix least-squares method except for disordering moieties. All calculations were performed using the CrystalStructure crystallographic software package except for refinement, which was performed using SHELXL-2014/7.

Crystal data for  $(\mathbf{1c})_3\supset[\mathbf{3a}]\text{Cl}_2$ : C<sub>172</sub>H<sub>214</sub>Cl<sub>2</sub>N<sub>6</sub>O<sub>43</sub>Ru,  $M = 322.57$ , space group  $P\bar{1}$  (no. 2),  $a = 15.793(2)$ ,  $b = 20.409(3)$ ,  $c = 30.746(5)$  Å,  $\alpha = 85.012(5)^\circ$ ,  $\beta = 83.649(6)^\circ$ ,  $\gamma = 78.882(5)^\circ$ ,  $V = 9642.6(2)$  Å<sup>3</sup>,  $Z = 2$ ,  $F(000) = 3420$ ,  $D_c = 1.111$  g/cm<sup>3</sup>,  $\mu(\text{MoK}\alpha) = 1.79$  cm<sup>-1</sup>,  $T = 93(3)$ , 2043 variables refined with 42538 reflections with  $I > 2\sigma(I)$  to  $R1 = 0.1649$ . High flexibility of the molecules and the large solvent area in the crystal lattice required stereochemical restraints to stabilize the model structure. A combination of some restraints (SIMU and DELU) was applied for the refinement of anisotropic displacement parameters (ADP) for the molecules. The solvent molecules (MeOH and H<sub>2</sub>O) were assigned for the residual electron density in the large solvent area, that were refined isotropically. The contribution of scattered electron density from severely disordered solvent molecules at the center of the solvent area, which could not be modeled reasonably, were handled using the SQUEEZE routine in PLATON program. This crystal structure contains several checkCIF alerts (Alert A and B), owing to the highly flexible framework and the disordered solvent molecules. The alerts and responses are given below.

PLAT084\_ALERT\_3\_A

PROBLEM: High wR2 Value (i.e. > 0.25) .... 0.48

PLAT082\_ALERT\_2\_B

PROBLEM: High R1 Value .... 0.16

PLAT213\_ALERT\_2\_B

PROBLEM: Atom O63 has ADP max/min Ratio .... 5.0

PLAT250\_ALERT\_2\_B

PROBLEM: Large U3/U1 Ratio for Average U(i, j) Tensor .... 5.2

RESPONSE: These alerts originated from the high flexibility of the structure and severely disordered solvent molecules in the large solvent area. The molecules are weakly trapped in the crystal, giving the large thermal ellipsoids. Therefore, this refinement had extensively used restraints in a macromolecular fashion to stabilize the flexible moieties. The geometry and ADP restraints ensure a chemically and physically meaningful structural model.

PLAT260\_ALERT\_2\_B

PROBLEM: Large Average Ueq of Residue Including O2S 0.304

PLAT306\_ALERT\_2\_B

PROBLEM: Isolated Oxygen Atom (H-atoms Missing ?) ..... O3S

PROBLEM: Isolated Oxygen Atom (H-atoms Missing ?) ..... O4S

PROBLEM: Isolated Oxygen Atom (H-atoms Missing ?) ..... O5S  
 PROBLEM: Isolated Oxygen Atom (H-atoms Missing ?) ..... O6S  
 PROBLEM: Isolated Oxygen Atom (H-atoms Missing ?) ..... O7S  
 PROBLEM: Isolated Oxygen Atom (H-atoms Missing ?) ..... O8S  
 PROBLEM: Isolated Oxygen Atom (H-atoms Missing ?) ..... O9S  
 PROBLEM: Isolated Oxygen Atom (H-atoms Missing ?) ..... O10S  
 PROBLEM: Isolated Oxygen Atom (H-atoms Missing ?) ..... O11S  
 PROBLEM: Isolated Oxygen Atom (H-atoms Missing ?) ..... O12S  
 PROBLEM: Isolated Oxygen Atom (H-atoms Missing ?) ..... O13S  
 PROBLEM: Isolated Oxygen Atom (H-atoms Missing ?) ..... O14S

PLAT430\_ALERT\_2\_B

PROBLEM: Short Inter D...A Contact O1S ..O8S · 2.73 Ang.  
 PROBLEM: Short Inter D...A Contact O2S ..O9S · 2.74 Ang.  
 PROBLEM: Short Inter D...A Contact O3S ..O4S · 2.80 Ang.  
 PROBLEM: Short Inter D...A Contact O4S ..O8S · 2.71 Ang.  
 PROBLEM: Short Inter D...A Contact O6S ..O9S · 2.79 Ang.  
 PROBLEM: Short Inter D...A Contact O8S ..O9S · 2.75 Ang.

RESPONSE: These alerts derived from handling the disordered solvent molecules (O1S to O14S). This crystal contains large solvent area, where solvent molecules (MeOH and H<sub>2</sub>O) are disordered. The solvent molecules were refined isotropically on a basis of scattered electron density in the solvent area (Supplementary Fig. 35). Owing to the less ordered hydrogen-bonding network of the OH moieties, the position of hydrogen atoms could not be defined.

Metrical parameters for the crystal structure of (1c)<sub>3</sub>·[3]Cl<sub>2</sub>, are available free of charge from the Cambridge Crystallographic Data Centre under reference numbers CCDC-2152087.



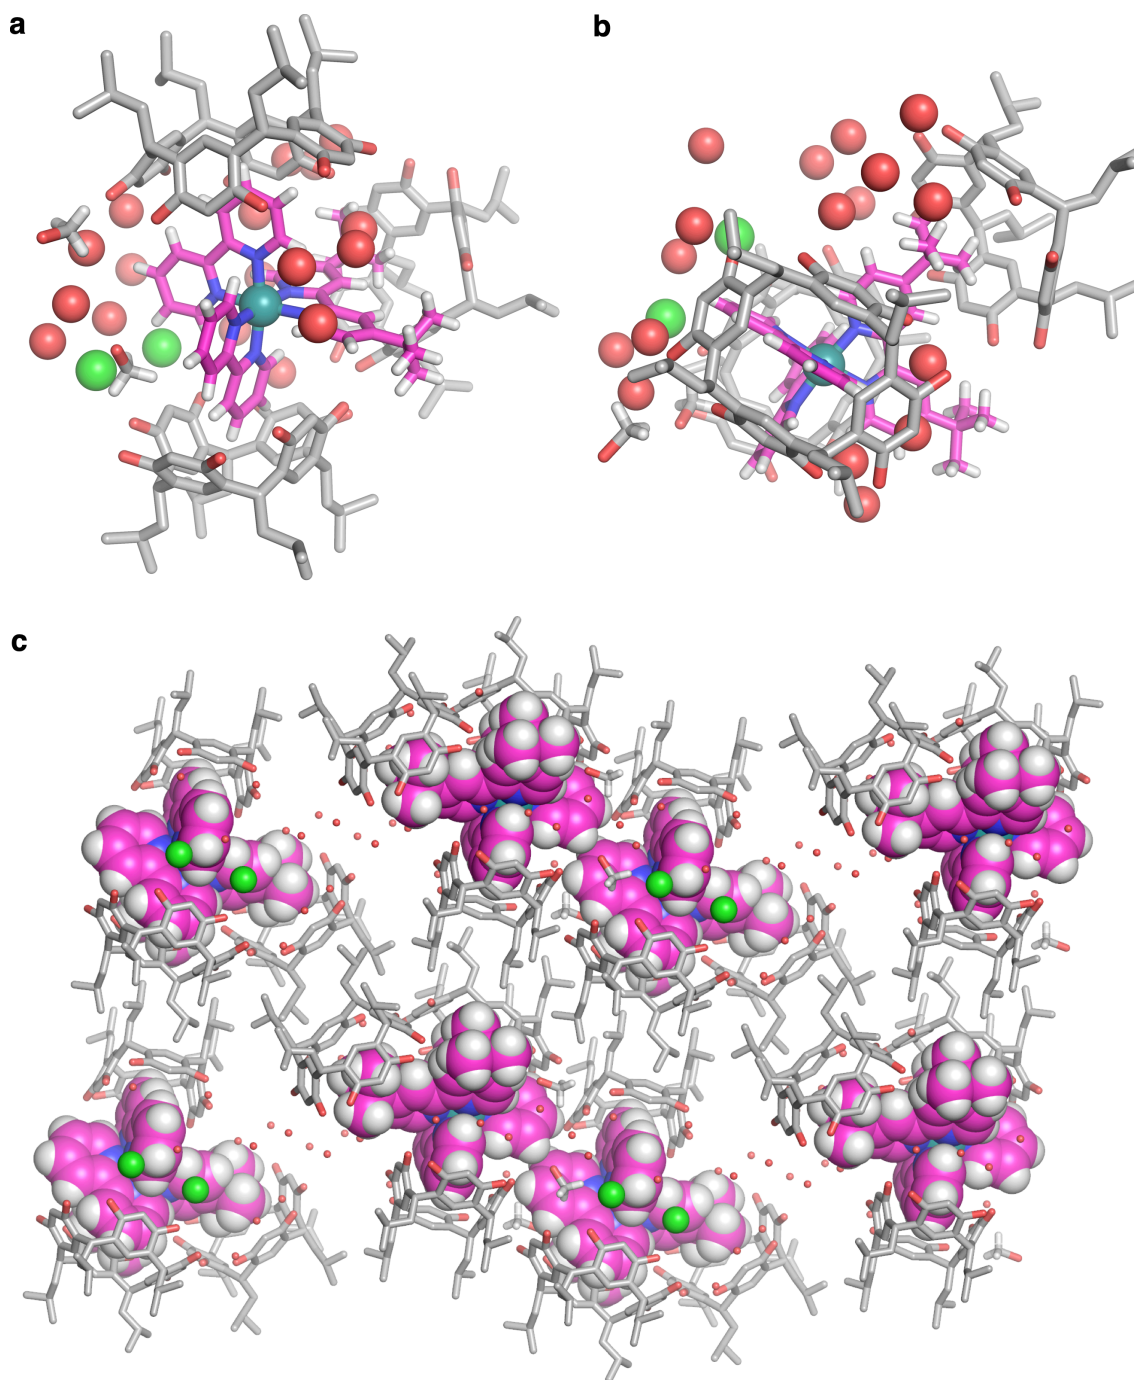

**Supplementary Fig. 32** Single crystal X-ray structure of inclusion complex  $(\mathbf{1c})_3 \supset [\mathbf{3a}]Cl_2$  (Ru, turquoise blue; Cl, green; O, red; N, blue; C, grey and pink; H, sky grey); **a** front view, and **b** top view. Disordered  $t$ Bu groups in  $\mathbf{1c}$  and hydrogen atoms are omitted for clarity. The Ru complex is non-covalently sandwiched by two resorcin[4]arene units by  $\pi$ - $\pi$  interactions between electron-deficient pyridine moieties in  $[\mathbf{3a}]^{2+}$  and electron-rich aromatic surfaces of  $\mathbf{1c}$ , and one of the  $t$ Bu groups in  $[\mathbf{3a}]^{2+}$  is recognized by the third resorcin[4]arene via multiple  $CH \cdots \pi$  interactions. This partial host-guest motif nicely supports the solution structure proposed on the basis of the NMR experiments. The chloride ions of  $[\mathbf{3a}]Cl_2$  are trapped by hydrogen-bonds from OH groups of  $\mathbf{1c}$  to assist ion-pair formation upon encapsulation, being also in good agreement with the proposed anion-mediated host-guest formation mechanism in solution.

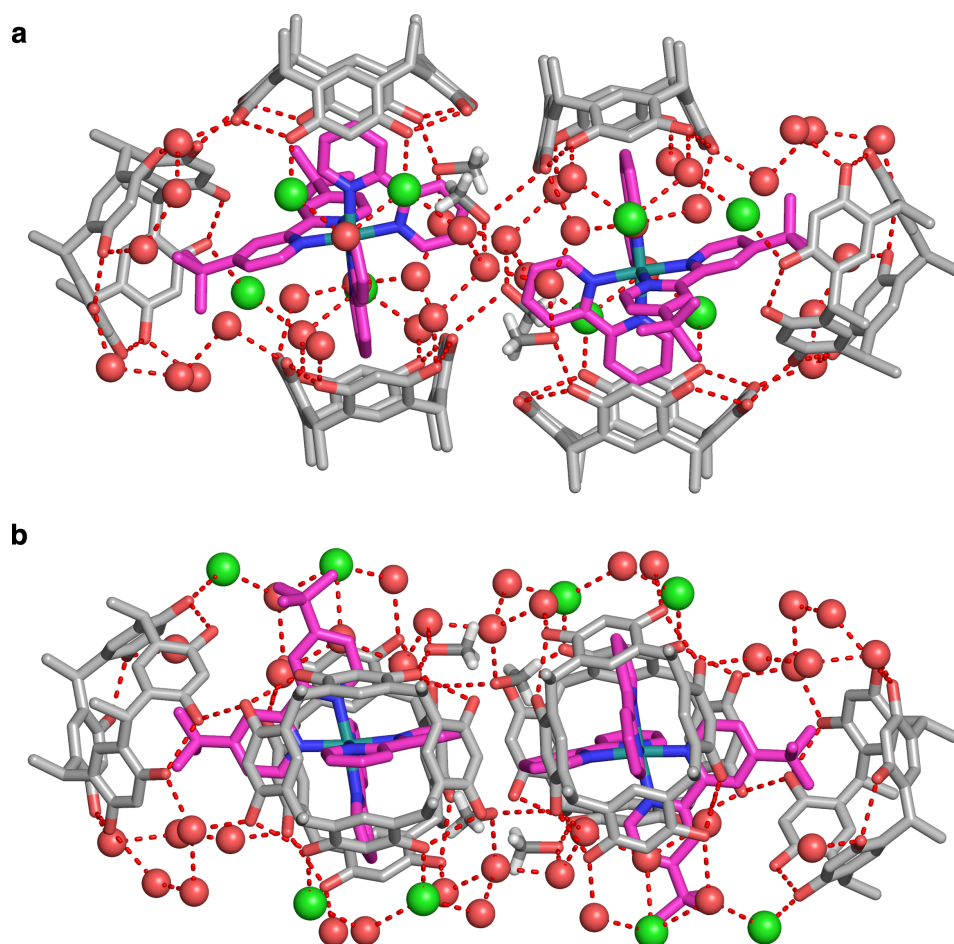

**Supplementary Fig. 33** Hydrogen-bonding network of inclusion complex  $(\mathbf{1c})_3\supset[\mathbf{3a}]\text{Cl}_2$  (Ru, turquoise blue; Cl, green; O, red; N, blue; C, grey and pink); **a** front view, and **b** top view. The  $t\text{Bu}$  groups of  $\mathbf{1c}$  and hydrogen atoms are omitted for clarity. The resorcin[4]arene trimer was stabilized by the host–guest interactions and connected via multiple hydrogen-bonds among the OH groups of  $\mathbf{1c}$ , solvent molecules, and Cl anions.

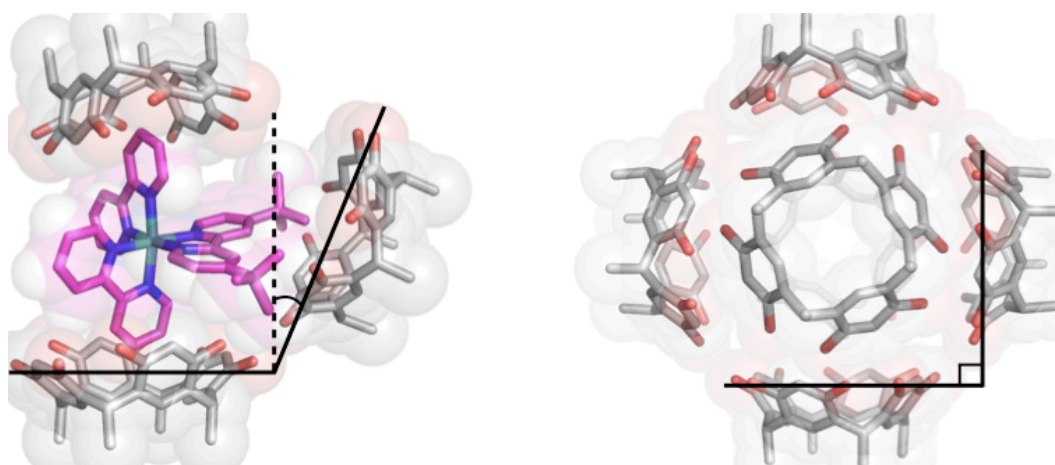

**Supplementary Fig. 34** Orientation of resorcin[4]arene units in  $(\mathbf{1c})_3\supset[\mathbf{3a}]\text{Cl}_2$  and the hexameric capsule. The resorcin[4]arene units are diagonally oriented in  $(\mathbf{1c})_3\supset[\mathbf{3a}]\text{Cl}_2$  owing to steric effect from  $t\text{Bu}$  groups in  $[\mathbf{3a}]^{2+}$ . This X-ray structure suggests that the  $t\text{Bu}$  group effectively destabilizes the hexameric capsule structure to promote the formation of the distorted hexameric resorcin[4]arene capsule.

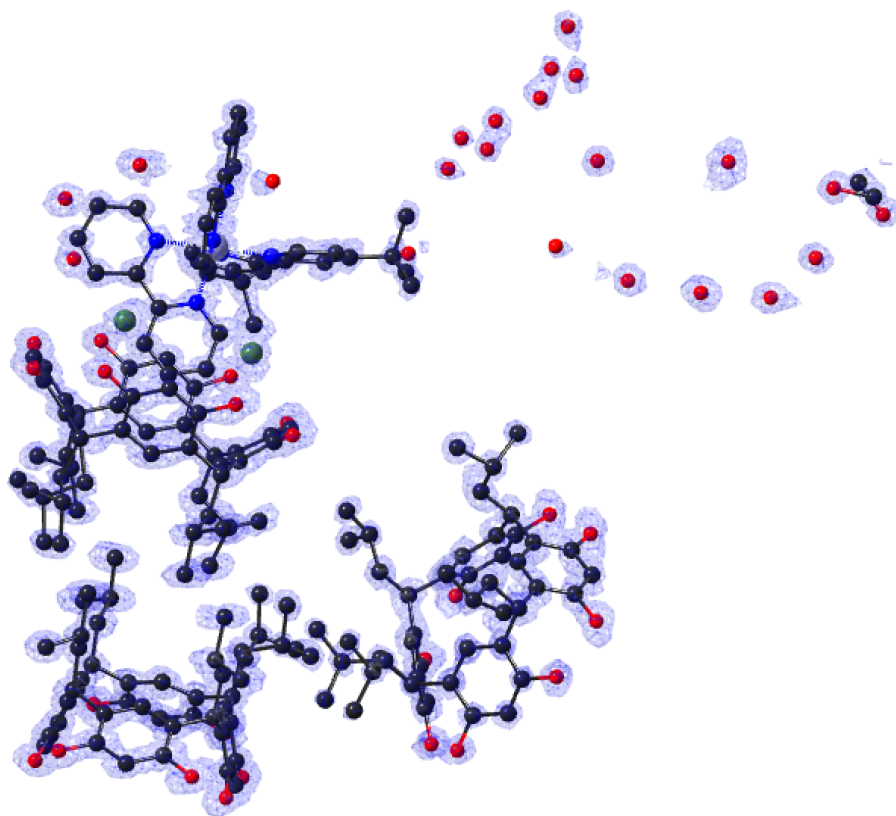

**Supplementary Fig.35** Electron density map of  $(1c)_3 \cdot [3a]Cl_2$ . Blue mesh represents observed electron density at  $1.0 \text{ e}/\text{\AA}^3$  level. The solvent molecules were refined on a basis of the scattered electron density in the solvent area.

## Photophysical studies

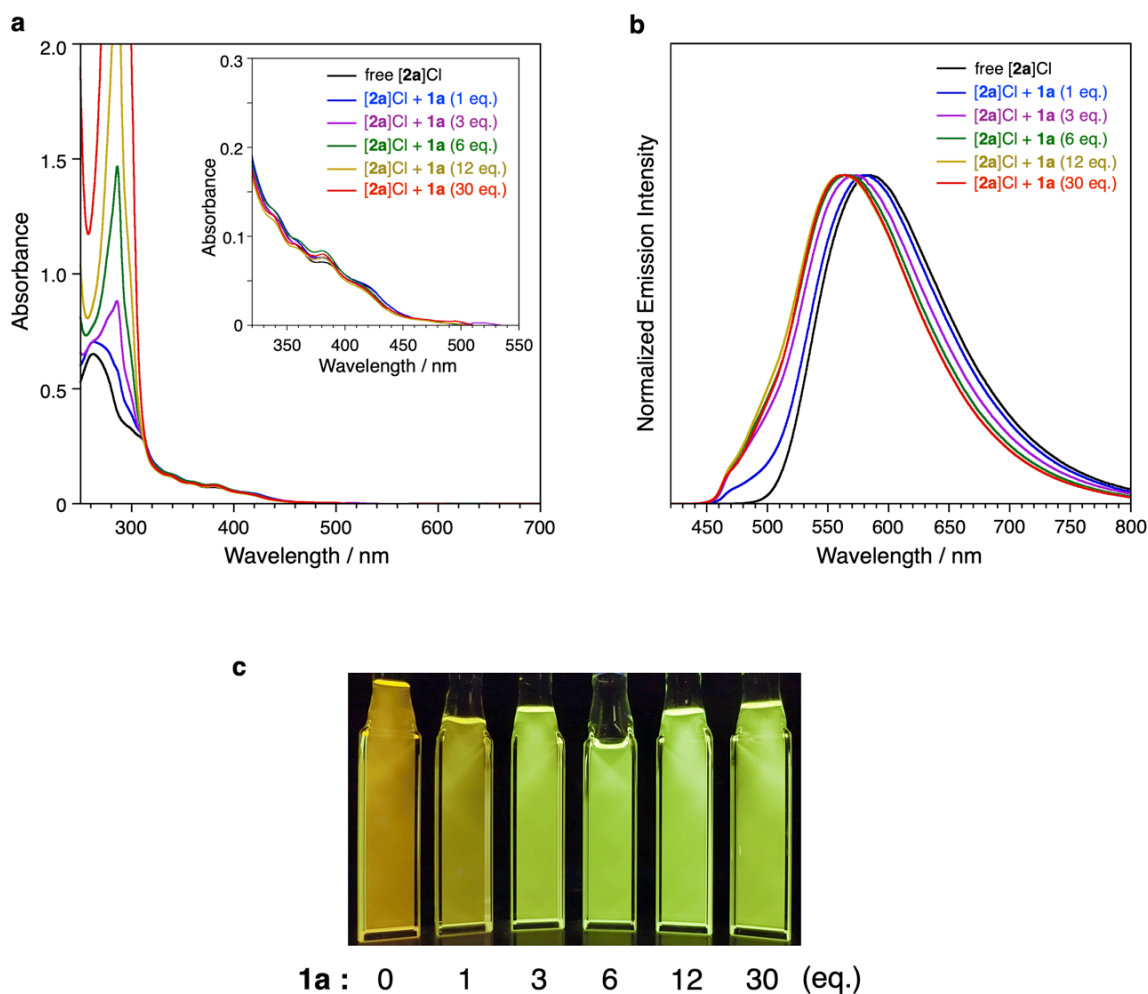

**Supplementary Fig. 36** **a** UV-vis absorption and **b** normalized emission spectra of the  $[2a]Cl$  in the presence of **1a** ( $\lambda_{ex} = 400$  nm), and **c** photographic images of the  $CHCl_3$  solutions ( $10 \mu M$  for  $[2a]Cl$ ) with various amounts of **1a** under photoirradiation ( $\lambda_{ex} = 365$  nm). The samples were heated at  $50^\circ C$  for 1 min before the measurements. The absorption spectra of  $[2a]Cl$  did not change significantly after encapsulation, meanwhile the emission spectra of  $[2a]^+$  showed blue-shift upon addition of **1a**.

**Supplementary Table 1.** Photophysical data ( $10 \mu M$  for  $[2a]Cl$ ,  $CHCl_3$ , r.t.) with **1a**.

| <b>[1a]</b><br>[ $\mu M$ ] | $\lambda_{em}$<br>[nm] | $\Phi$<br>[%] | $A_1$             | $\tau_1$<br>[ns] | $A_2$ | $\tau_2$<br>[ns] | $\tau_{ave}$<br>[ns] | $k_r$<br>[ $\times 10^5 s^{-1}$ ] | $k_{nr}$<br>[ $\times 10^5 s^{-1}$ ] |
|----------------------------|------------------------|---------------|-------------------|------------------|-------|------------------|----------------------|-----------------------------------|--------------------------------------|
| 0                          | 583                    | 40            | 0.25 <sup>a</sup> | 510 <sup>a</sup> |       |                  | 510 <sup>a</sup>     | 7.8                               | 11.8                                 |
| 10                         | 580                    | 43            | 0.86              | 440              | 0.14  | 1300             | 720                  | 6.0                               | 7.9                                  |
| 30                         | 573                    | 55            | 0.71              | 610              | 0.29  | 1300             | 930                  | 5.9                               | 4.8                                  |
| 60                         | 564                    | 63            | 0.79              | 800              | 0.21  | 1470             | 1020                 | 6.2                               | 3.6                                  |
| 120                        | 563                    | 69            | 0.80              | 850              | 0.20  | 1540             | 1060                 | 6.5                               | 2.9                                  |
| 300                        | 562                    | 73            | 0.90              | 930              | 0.10  | 1800             | 1090                 | 6.7                               | 2.5                                  |

<sup>a</sup> analysed by a single exponential decay.

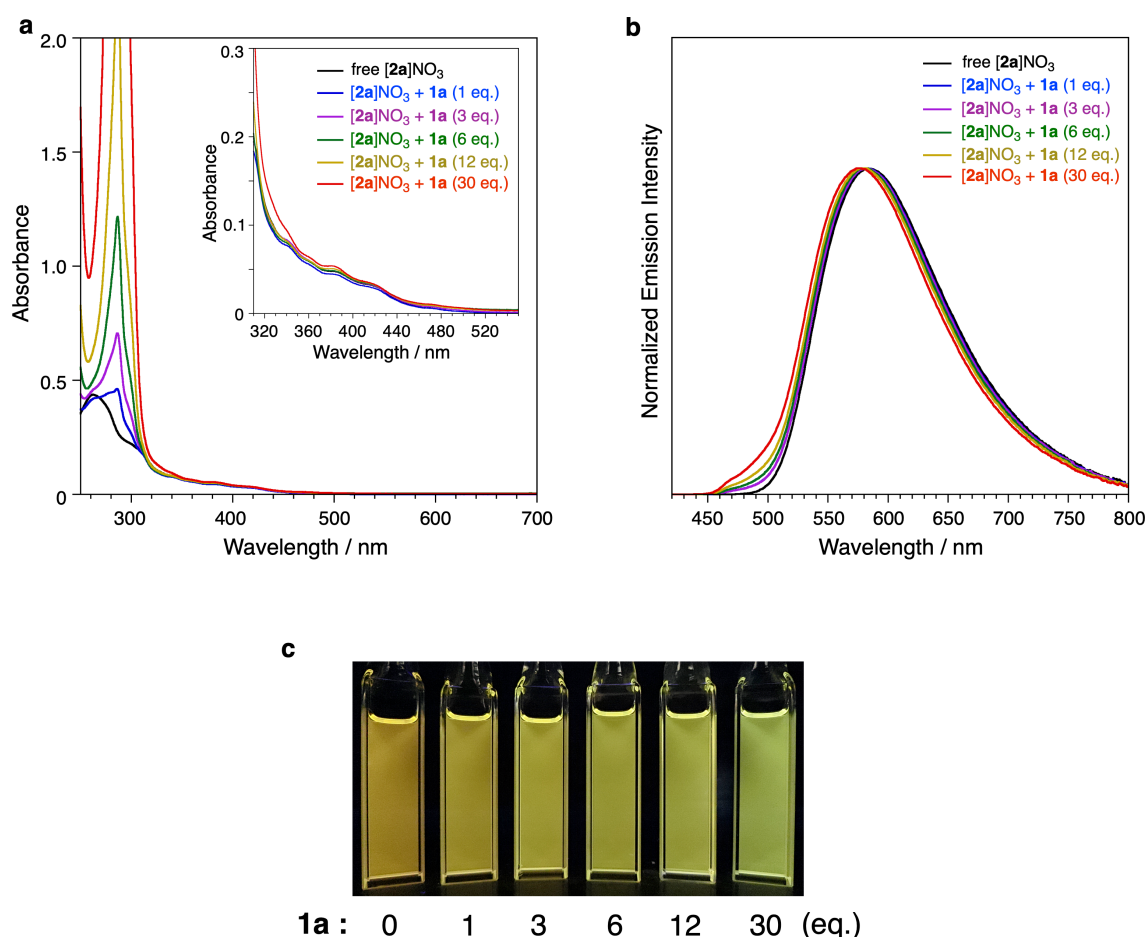

**Supplementary Fig. 37** **a** UV-vis absorption and **b** normalized emission spectra of the [2a]NO<sub>3</sub> in the presence of **1a** ( $\lambda_{\text{ex}} = 400$  nm), and **c** photographic images of the CHCl<sub>3</sub> solutions (10 μM for [2a]NO<sub>3</sub>) with various amounts of **1a** under photoirradiation ( $\lambda_{\text{ex}} = 365$  nm). The absorption spectra of [2a]NO<sub>3</sub> did not change significantly after encapsulation, meanwhile the emission spectra of [2a]<sup>+</sup> showed blue-shift upon addition of **1a**.

**Supplementary Table 2.** Photophysical data (10 μM for [2a]NO<sub>3</sub>, CHCl<sub>3</sub>, r.t.) with **1a**.

| [ <b>1a</b> ]<br>[μM] | $\lambda_{\text{em}}$<br>[nm] | $\Phi$<br>[%] | $A_1$             | $\tau_1$<br>[ns] | $A_2$ | $\tau_2$<br>[ns] | $\tau_{\text{ave}}$<br>[ns] | $k_r$<br>[ $\times 10^5$ s <sup>-1</sup> ] | $k_{\text{nr}}$<br>[ $\times 10^5$ s <sup>-1</sup> ] |
|-----------------------|-------------------------------|---------------|-------------------|------------------|-------|------------------|-----------------------------|--------------------------------------------|------------------------------------------------------|
| 0                     | 583                           | 46            | 1.07 <sup>a</sup> | 580 <sup>a</sup> |       |                  | 580 <sup>a</sup>            | 7.9                                        | 9.3                                                  |
| 10                    | 581                           | 43            | 0.90              | 560              | 0.10  | 1050             | 640                         | 6.7                                        | 8.8                                                  |
| 30                    | 581                           | 43            | 0.85              | 550              | 0.15  | 1040             | 670                         | 6.4                                        | 8.5                                                  |
| 60                    | 580                           | 43            | 0.80              | 510              | 0.20  | 1080             | 710                         | 6.1                                        | 8.1                                                  |
| 120                   | 579                           | 45            | 0.07              | 490              | 0.30  | 1030             | 750                         | 6.0                                        | 7.4                                                  |
| 300                   | 577                           | 50            | 0.59              | 610              | 0.41  | 1120             | 900                         | 5.6                                        | 5.6                                                  |

<sup>a</sup> analysed by a single exponential decay.



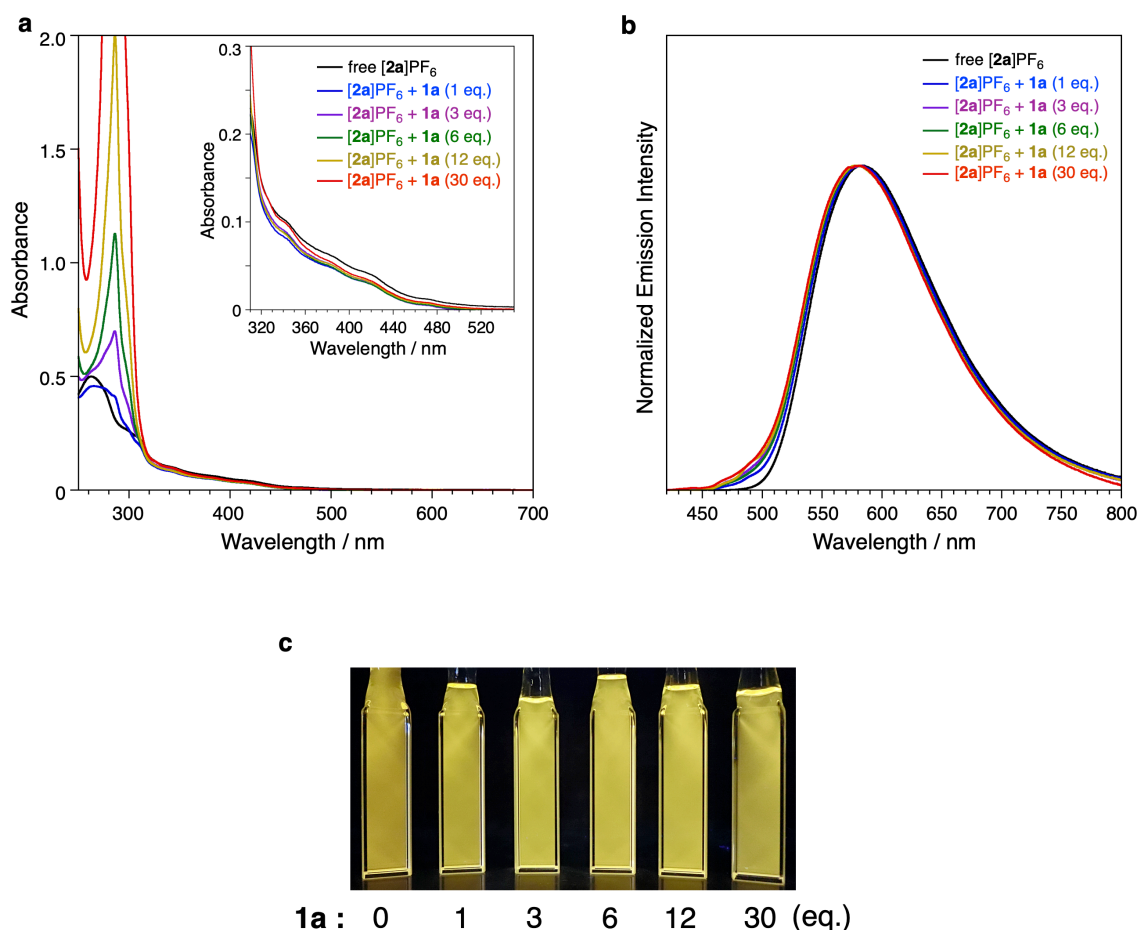

**Supplementary Fig. 38** **a** UV-vis absorption and **b** normalized emission spectra of the  $[2a]PF_6$  in the presence of **1a** ( $\lambda_{ex} = 400$  nm), and **c** photographic images of the  $CHCl_3$  solutions ( $10 \mu M$  for  $[2a]PF_6$ ) with various amounts of **1a** under photoirradiation ( $\lambda_{ex} = 365$  nm). Both the absorption and the emission spectra of  $[2a]PF_6$  did not change significantly depending on the concentration of **1a** because the Ir complex salt with large counter anion was not adapted with the cavity of **1a**.

**Supplementary Table 3.** Photophysical data ( $10 \mu M$  for  $[2a]PF_6$ ,  $CHCl_3$ , r.t.) with **1a**.

| [ <b>1a</b> ]<br>[ $\mu M$ ] | $\lambda_{em}$<br>[nm] | $\Phi$<br>[%] | $A_1$             | $\tau_1$<br>[ns] | $A_2$ | $\tau_2$<br>[ns] | $\tau_{ave}$<br>[ns] | $k_r$<br>[ $\times 10^5 s^{-1}$ ] | $k_{nr}$<br>[ $\times 10^5 s^{-1}$ ] |
|------------------------------|------------------------|---------------|-------------------|------------------|-------|------------------|----------------------|-----------------------------------|--------------------------------------|
| 0                            | 583                    | 39            | 0.18 <sup>a</sup> | 660 <sup>a</sup> |       |                  | 510 <sup>a</sup>     | 5.9                               | 9.2                                  |
| 10                           | 581                    | 45            | 0.99              | 660              | 0.01  | 2010             | 700                  | 6.4                               | 7.8                                  |
| 30                           | 581                    | 49            | 0.98              | 740              | 0.02  | 2040             | 810                  | 6.0                               | 6.3                                  |
| 60                           | 580                    | 52            | 0.99              | 770              | 0.01  | 2200             | 830                  | 6.3                               | 5.8                                  |
| 120                          | 580                    | 53            | 0.97              | 790              | 0.03  | 2210             | 890                  | 6.0                               | 5.3                                  |
| 300                          | 580                    | 53            | 0.97              | 790              | 0.03  | 2230             | 900                  | 5.9                               | 5.2                                  |

<sup>a</sup> analysed by a single exponential decay.

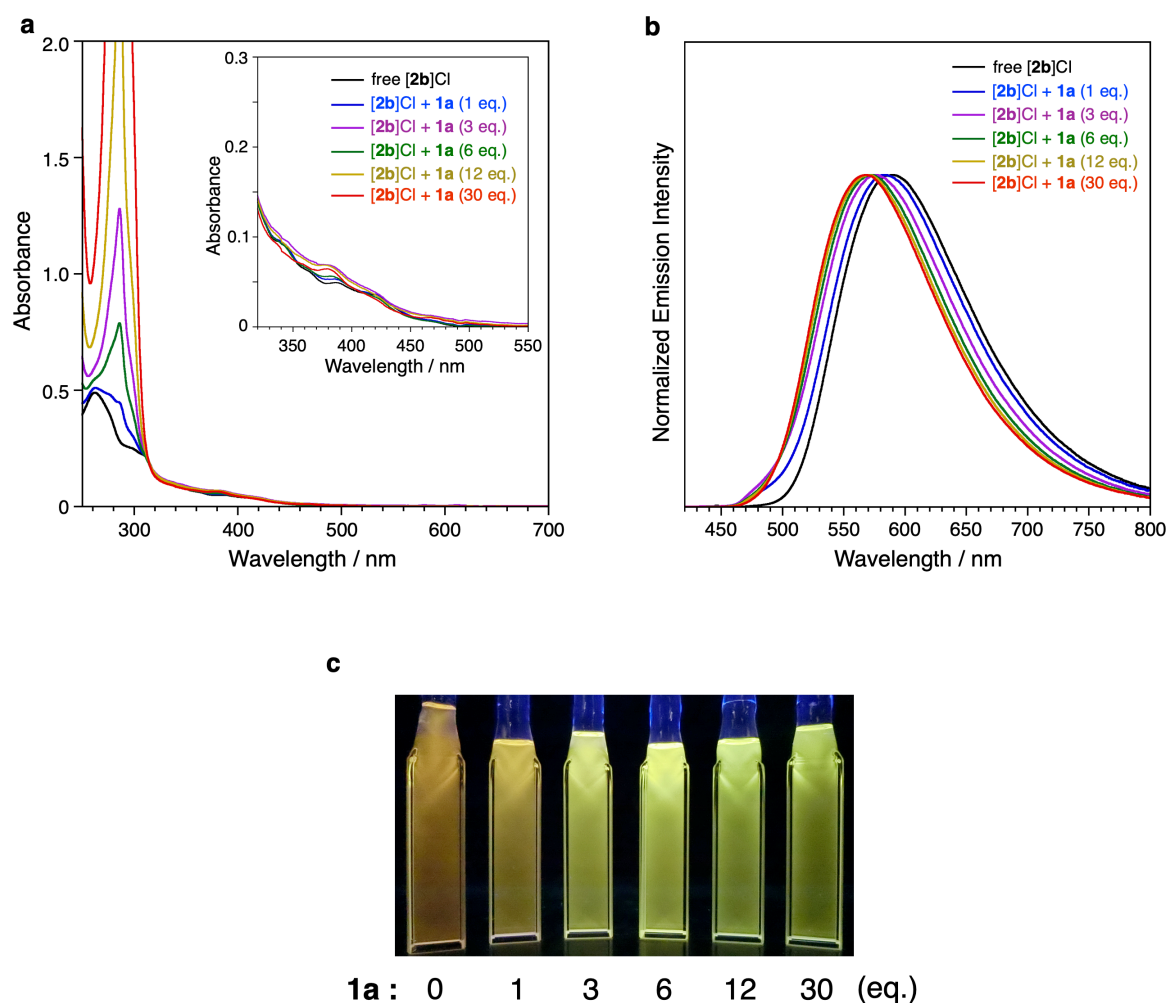

**Supplementary Fig. 39** **a** UV-vis absorption and **b** normalized emission spectra of the  $[2b]Cl$  in the presence of **1a** ( $\lambda_{ex} = 400$  nm), and **c** photographic images of the  $CHCl_3$  solutions ( $10 \mu M$  for  $[2b]Cl$ ) with various amounts of **1a** under photoirradiation ( $\lambda_{ex} = 365$  nm). The samples were heated at  $50^\circ C$  for 1 min before the measurements. The absorption spectra of  $[2b]Cl$  did not change significantly after encapsulation, meanwhile the emission spectra of  $[2b]^+$  showed blue-shift upon addition of **1a**.

**Supplementary Table 4.** Photophysical data ( $10 \mu M$  for  $[2b]Cl$ ,  $CHCl_3$ , r.t.) with **1a**.

| $[1a]$<br>[ $\mu M$ ] | $\lambda_{em}$<br>[nm] | $\Phi$<br>[%] | $A_1$             | $\tau_1$<br>[ns] | $A_2$ | $\tau_2$<br>[ns] | $\tau_{ave}$<br>[ns] | $k_r$<br>[ $\times 10^5 s^{-1}$ ] | $k_{nr}$<br>[ $\times 10^5 s^{-1}$ ] |
|-----------------------|------------------------|---------------|-------------------|------------------|-------|------------------|----------------------|-----------------------------------|--------------------------------------|
| 0                     | 590                    | 26            | 0.20 <sup>a</sup> | 450 <sup>a</sup> |       |                  | 450 <sup>a</sup>     | 5.8                               | 16.4                                 |
| 10                    | 581                    | 32            | 0.84              | 470              | 0.16  | 1140             | 680                  | 4.7                               | 10.0                                 |
| 30                    | 577                    | 37            | 0.78              | 500              | 0.22  | 1110             | 740                  | 5.0                               | 8.5                                  |
| 60                    | 572                    | 39            | 0.62              | 500              | 0.38  | 1090             | 840                  | 4.6                               | 7.3                                  |
| 120                   | 570                    | 42            | 0.58              | 520              | 0.42  | 1200             | 950                  | 4.4                               | 6.1                                  |
| 300                   | 568                    | 47            | 0.51              | 540              | 0.49  | 1190             | 980                  | 4.8                               | 5.4                                  |

<sup>a</sup> analysed by a single exponential decay.

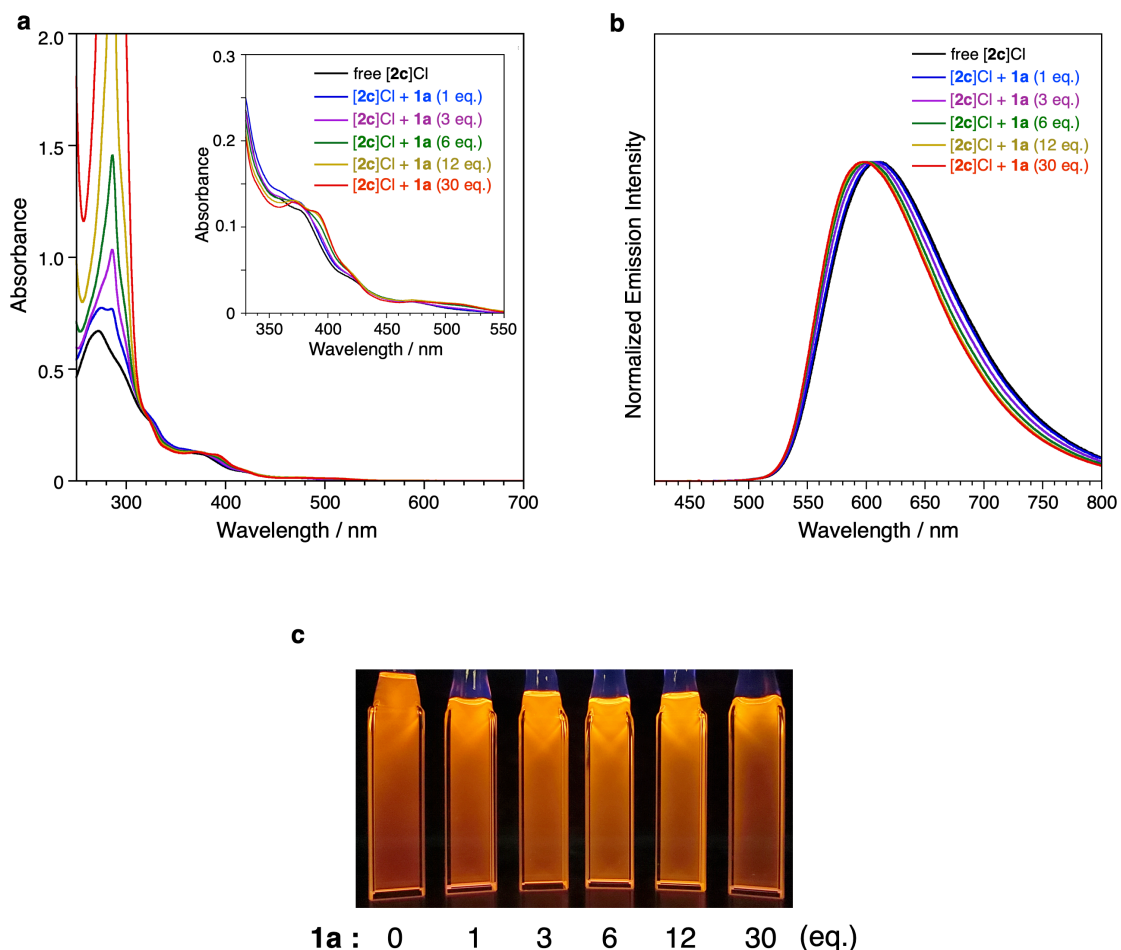

**Supplementary Fig. 40** **a** UV-vis absorption and **b** normalized emission spectra of the [2c]Cl in the presence of **1a** ( $\lambda_{\text{ex}} = 400$  nm), and **c** photographic images of the  $\text{CHCl}_3$  solutions ( $10 \mu\text{M}$  for [2c]Cl) with various amounts of **1a** under photoirradiation ( $\lambda_{\text{ex}} = 365$  nm). The samples were heated at  $50^\circ\text{C}$  for 1 min before the measurements. Both the absorption and the emission spectra of [2c]Cl did not change significantly depending on the concentration of **1a**, because the Ir complex cation was not adapted with the capsule (**1a**)<sub>n</sub>.

**Supplementary Table 5.** Photophysical data ( $10 \mu\text{M}$  for [2c]Cl,  $\text{CHCl}_3$ , r.t.) with **1a**.

| [ <b>1a</b> ]<br>[ $\mu\text{M}$ ] | $\lambda_{\text{em}}$<br>[nm] | $\Phi$<br>[%] | $A_1$             | $\tau_1$<br>[ns] | $A_2$ | $\tau_2$<br>[ns] | $\tau_{\text{ave}}$<br>[ns] | $k_r$<br>[ $\times 10^5 \text{ s}^{-1}$ ] | $k_{\text{nr}}$<br>[ $\times 10^5 \text{ s}^{-1}$ ] |
|------------------------------------|-------------------------------|---------------|-------------------|------------------|-------|------------------|-----------------------------|-------------------------------------------|-----------------------------------------------------|
| 0                                  | 611                           | 35            | 0.18 <sup>a</sup> | 510 <sup>a</sup> |       |                  | 510 <sup>a</sup>            | 6.9                                       | 12.7                                                |
| 10                                 | 610                           | 36            | 0.79              | 420              | 0.21  | 700              | 510                         | 7.1                                       | 12.5                                                |
| 30                                 | 605                           | 38            | 0.84              | 460              | 0.16  | 750              | 530                         | 7.1                                       | 11.7                                                |
| 60                                 | 601                           | 44            | 0.91              | 500              | 0.09  | 840              | 550                         | 8.0                                       | 10.2                                                |
| 120                                | 599                           | 48            | 0.95              | 560              | 0.05  | 960              | 590                         | 8.1                                       | 8.8                                                 |
| 300                                | 598                           | 50            | 0.98              | 620              | 0.02  | 1260             | 650                         | 7.7                                       | 7.7                                                 |

<sup>a</sup> analysed by a single exponential decay.



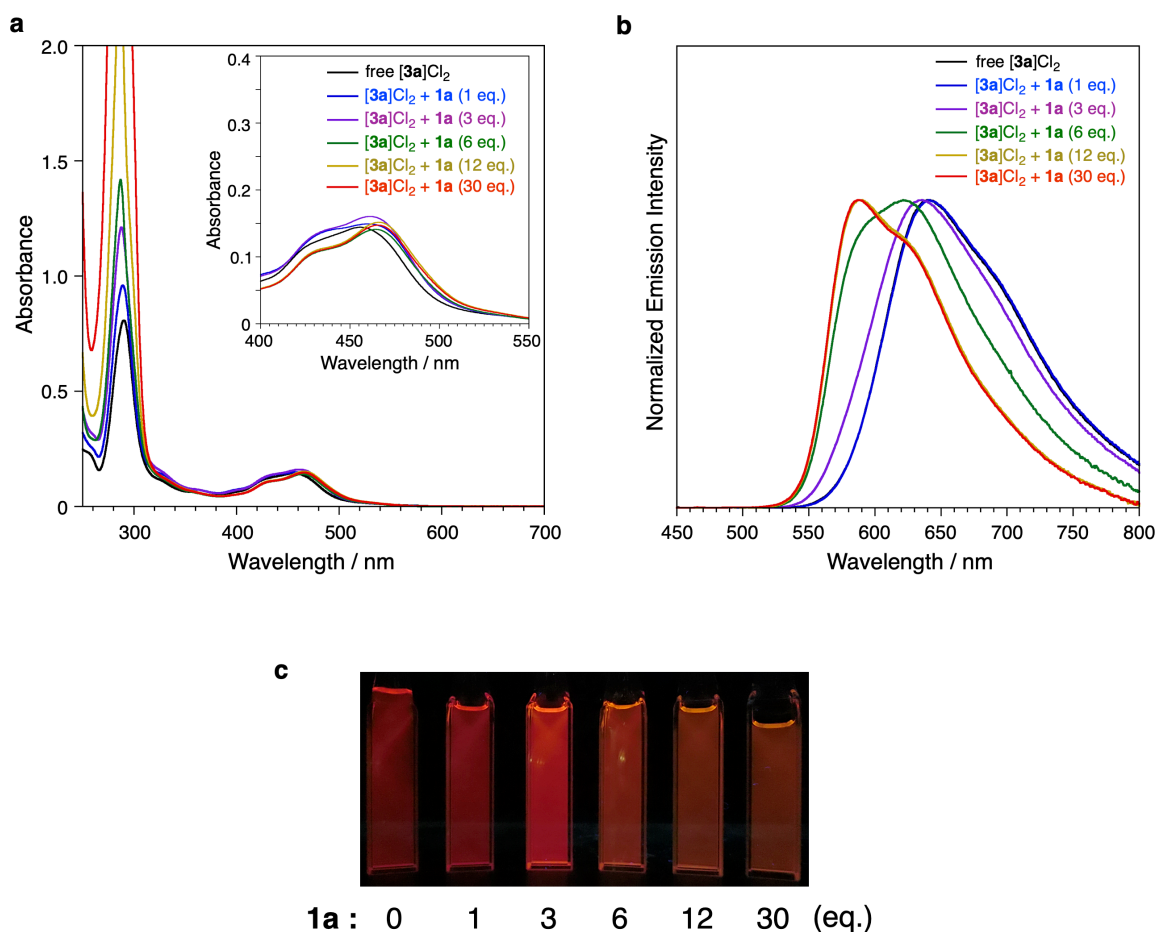

**Supplementary Fig. 41** **a** UV-vis absorption and **b** normalized emission spectra of the  $[3a]Cl_2$  in the presence of **1a** ( $\lambda_{ex} = 400$  nm), and **c** photographic images of the  $CHCl_3$  solutions ( $10 \mu M$  for  $[3a]Cl_2$ ) with various amounts of **1a** under photoirradiation ( $\lambda_{ex} = 365$  nm). The samples were heated at  $50^\circ C$  for 1 min before the measurements. The absorption spectra of  $[3a]Cl_2$  did not change significantly after encapsulation, meanwhile the emission spectra of  $[3a]^{2+}$  showed blue-shift upon addition of **1a**.

**Supplementary Table 6.** Photophysical data ( $10 \mu M$  for  $[3a]Cl_2$ ,  $CHCl_3$ , r.t.) with **1a**.

| <b>[1a]</b><br>[ $\mu M$ ] | $\lambda_{em}$<br>[nm] | $\Phi$<br>[%] | $A_1$             | $\tau_1$<br>[ns] | $A_2$ | $\tau_2$<br>[ns] | $\tau_{ave}$<br>[ns] | $k_r$<br>[ $\times 10^5 s^{-1}$ ] | $k_{nr}$<br>[ $\times 10^5 s^{-1}$ ] |
|----------------------------|------------------------|---------------|-------------------|------------------|-------|------------------|----------------------|-----------------------------------|--------------------------------------|
| 0                          | 641                    | 12            | 0.18 <sup>a</sup> | 610 <sup>a</sup> |       |                  | 610 <sup>a</sup>     | 2.0                               | 14.4                                 |
| 10                         | 641                    | 11            | 0.27              | 450              | 0.73  | 650              | 610                  | 1.8                               | 14.6                                 |
| 30                         | 636                    | 10            | 0.82              | 440              | 0.18  | 1210             | 730                  | 1.4                               | 12.3                                 |
| 60                         | 622                    | 7             | 0.59              | 300              | 0.41  | 1390             | 1140                 | 6.1                               | 8.2                                  |
| 120                        | 589                    | 6             | 0.58              | 260              | 0.42  | 1530             | 1290                 | 4.6                               | 7.3                                  |
| 300                        | 587                    | 5             | 0.60              | 240              | 0.40  | 1540             | 1300                 | 3.9                               | 7.4                                  |

<sup>a</sup> analysed by a single exponential decay.

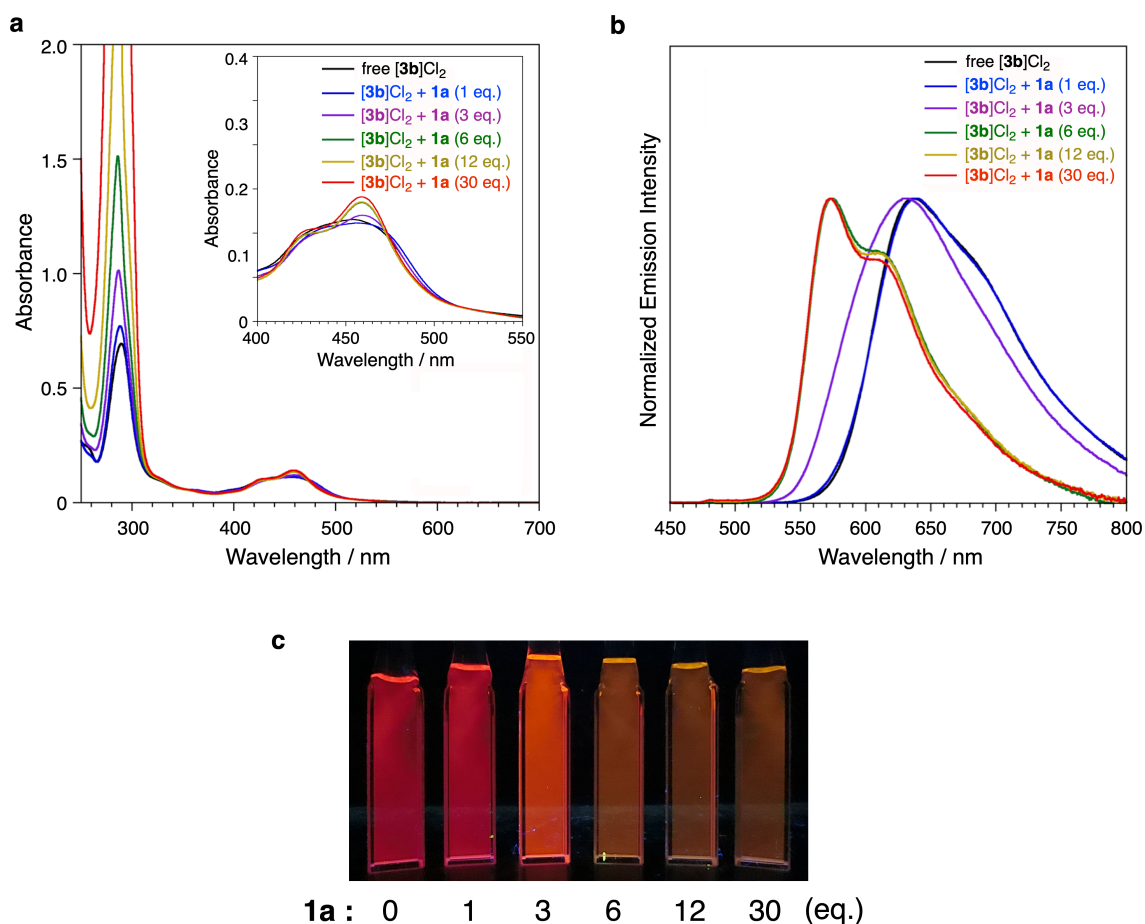

**Supplementary Fig. 42** **a** UV-vis absorption and **b** normalized emission spectra of the [3b]Cl<sub>2</sub> in the presence of 1a ( $\lambda_{\text{ex}} = 400$  nm), and **c** photographic images of the CHCl<sub>3</sub> solutions (10  $\mu\text{M}$  for [3b]Cl<sub>2</sub>) with various amounts of 1a under photoirradiation ( $\lambda_{\text{ex}} = 365$  nm). The absorption spectra of [3b]Cl<sub>2</sub> did not change significantly after encapsulation, meanwhile the emission spectra of [3b]<sup>2+</sup> showed blue-shift upon addition of 1a. <sup>a</sup> After encapsulation by heating at 50 °C for 1 min.

**Supplementary Table 7.** Photophysical data (10  $\mu\text{M}$  for [3b]Cl<sub>2</sub>, CHCl<sub>3</sub>, r.t.) with 1a.

| [1a]<br>[ $\mu\text{M}$ ] | $\lambda_{\text{em}}$<br>[nm] | $\Phi$<br>[%] | $A_1$              | $\tau_1$<br>[ns] | $A_2$ | $\tau_2$<br>[ns] | $\tau_{\text{ave}}$<br>[ns] | $k_r$<br>[ $\times 10^5 \text{ s}^{-1}$ ] | $k_{\text{nr}}$<br>[ $\times 10^5 \text{ s}^{-1}$ ] |
|---------------------------|-------------------------------|---------------|--------------------|------------------|-------|------------------|-----------------------------|-------------------------------------------|-----------------------------------------------------|
| 0                         | 638                           | 14            | 0.006 <sup>a</sup> | 700 <sup>a</sup> |       |                  | 700 <sup>a</sup>            | 2.0                                       | 12.3                                                |
| 10                        | 638                           | 14            | 0.13               | 260              | 0.87  | 680              | 650                         | 2.1                                       | 13.1                                                |
| 30                        | 631                           | 10            | 0.69               | 360              | 0.31  | 1000             | 730                         | 1.4                                       | 12.3                                                |
| 60                        | 573                           | 4             | 0.91               | 180              | 0.09  | 1240             | 620                         | 0.65                                      | 15.6                                                |
| 120                       | 573                           | 2             | 0.96               | 180              | 0.04  | 980              | 320                         | 0.62                                      | 30.3                                                |
| 300                       | 573                           | 2             | 0.95               | 180              | 0.05  | 850              | 310                         | 0.63                                      | 30.7                                                |

<sup>a</sup> analysed by a single exponential decay.

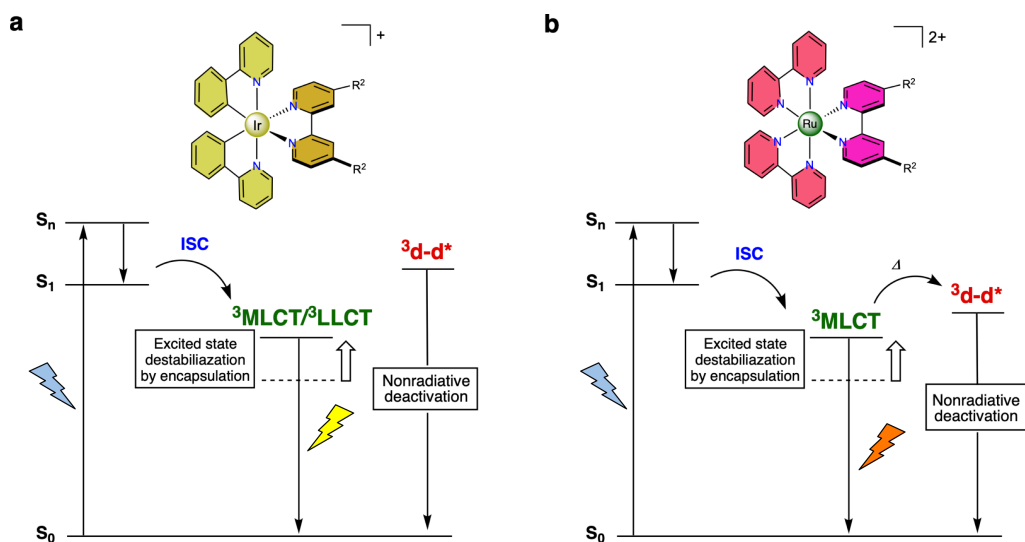

**Supplementary Fig. 43** Proposed photo-excited dynamics of **a** the Ir complex cation, and **b** the Ru complex cation after host-guest formation. The Ir complex, whose triplet  $d-d^*$  excited state lays at much higher level than the lowest  ${}^3\text{MLCT}/{}^3\text{LLCT}$  excited state, can show EIEE behavior by encapsulation. On the other hand, as the energy level of the  ${}^3\text{MLCT}$  state is destabilized by encapsulation and its energy level might be comparable with the  $d-d^*$  excited state of the Ru complex,<sup>6</sup> thermal activation from  ${}^3\text{MLCT}$  to the  $d-d^*$  excited state is suggested to be promoted, causing reduced emission quantum yield and lifetime.

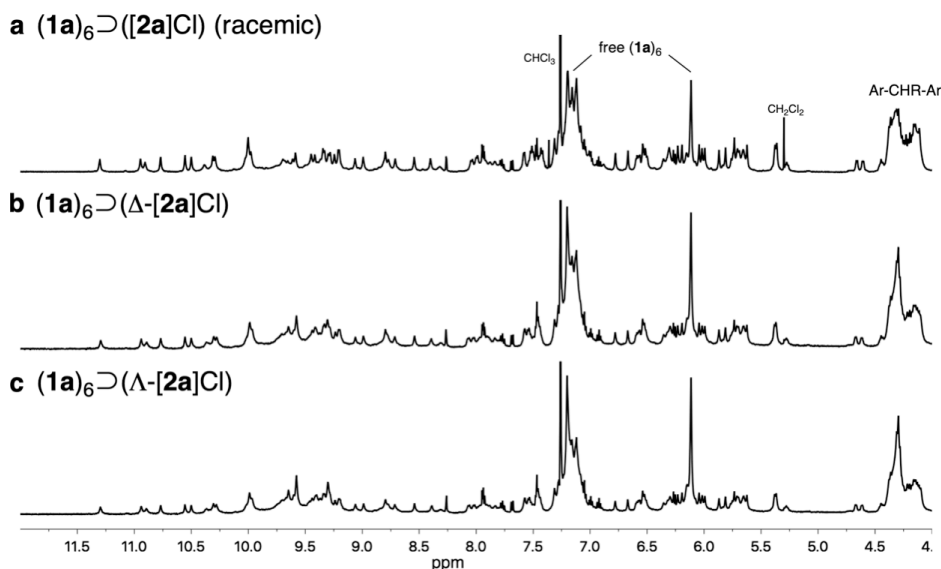

**Supplementary Fig. 44**  $^1H$  NMR spectra (500 MHz,  $CDCl_3$ , r.t.) of host-guest complex  $[(1a)_6 \supset [2a]Cl]$  obtained from **a** racemic compound  $[2a]Cl$ , **b**  $\Delta-[2a]Cl$ , and **c**  $\Lambda-[2a]Cl$ . These results clearly showed that the symmetry-breaking assembly was independent on the chirality of the guest.

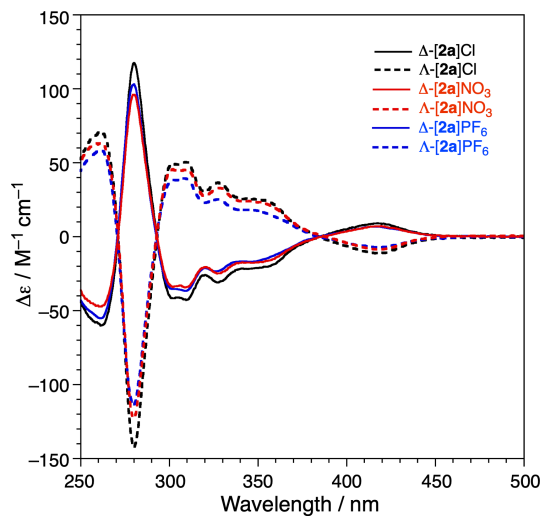

**Supplementary Fig. 45** Circular dichroism (CD) spectra (10  $\mu M$ ,  $CHCl_3$ , r.t.) of enantiomerically pure  $\Lambda$ - and  $\Delta$ - Ir complex salts, showing that the CD spectra of the complex cation are irrespective to their counter anions.

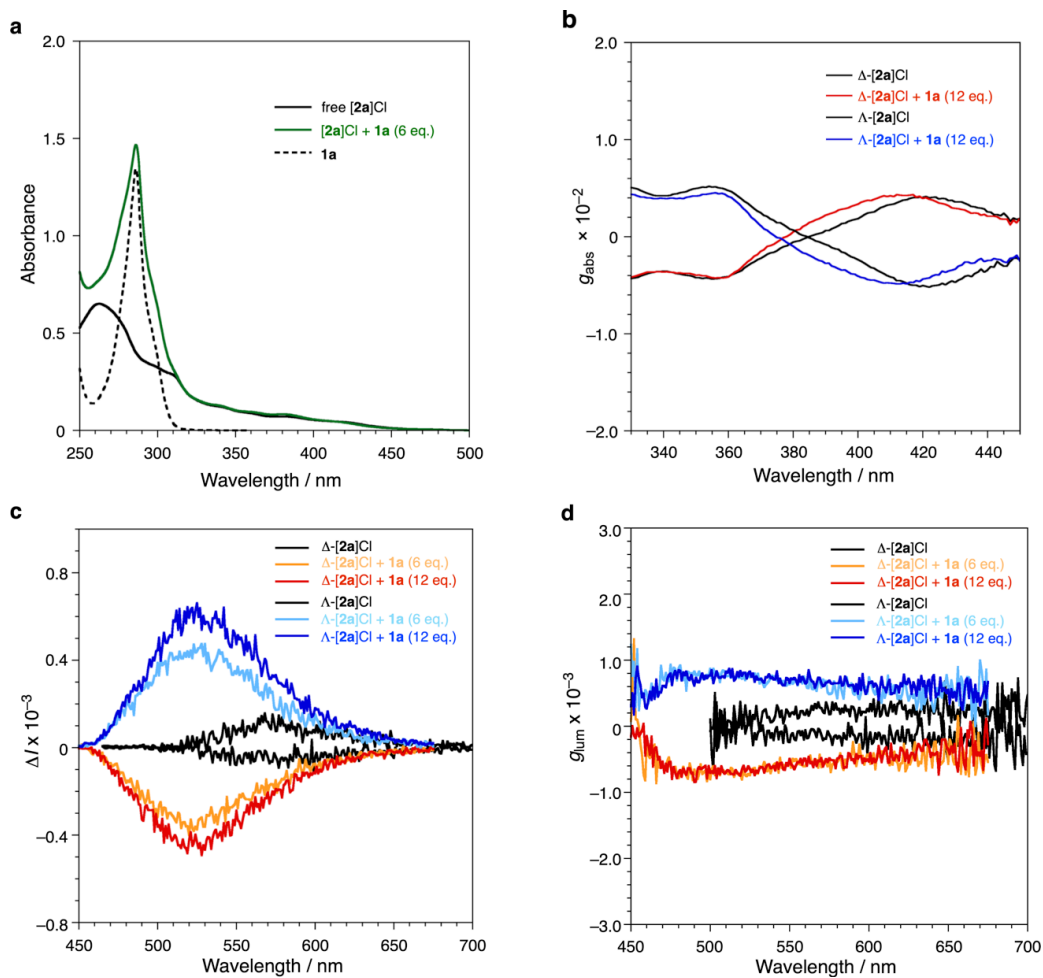

**Supplementary Fig. 46** **a** UV-vis absorption spectra ( $\text{CHCl}_3$ , r.t.) of free [2a]Cl (10  $\mu\text{M}$ ) and 1a (60  $\mu\text{M}$ ), **b** dissymmetry factor ( $g_{\text{abs}}$ ) of the CD property, which was estimated by the equation ( $g_{\text{abs}} = \Delta\epsilon_{\text{CD}} / \epsilon_{\text{UV-vis}}$ ), **c** Circularly polarized luminescence (CPL) spectra (50  $\mu\text{M}$ ,  $\text{CHCl}_3$ , r.t.) of enantiomerically pure Ir complex [2a]Cl (50  $\mu\text{M}$ ) with resorcin[4]arene monomer 1a (0, 300, 600  $\mu\text{M}$ ), and **d** dissymmetry factor ( $g_{\text{lum}}$ ) of the CPL property.  $\lambda_{\text{ex}} = 350 \text{ nm}$ . The samples were heated at 50  $^\circ\text{C}$  for 1 min before the measurements.

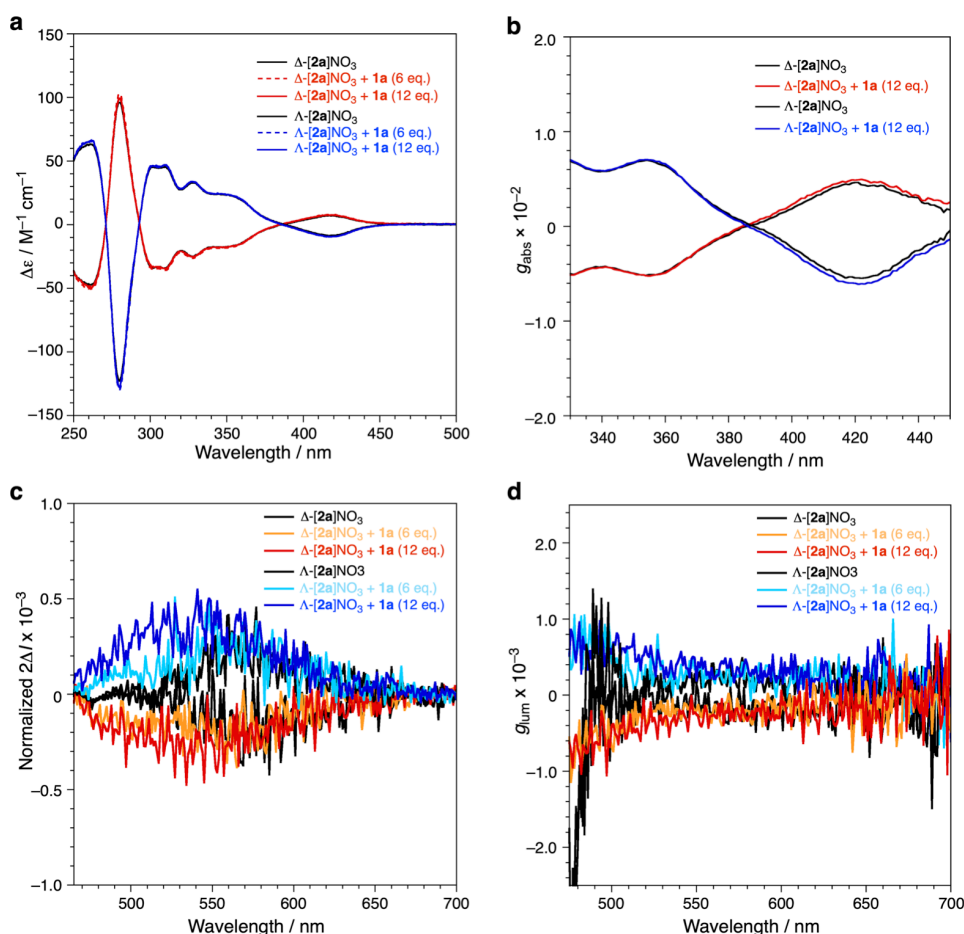

**Supplementary Fig. 47** **a** Circular dichroism (CD) spectra (10 μM, CHCl<sub>3</sub>, r.t.) of  $\Delta$ - and  $\Lambda$ -[**2a**]NO<sub>3</sub> in the presence of resorcin[4]arene **1a** (0, 60, 120 μM), **b** dissymmetry factor ( $g_{\text{abs}}$ ) of the CD property, which was estimated by the equation ( $g_{\text{abs}} = \Delta\epsilon_{\text{CD}}/\epsilon_{\text{UV-Vis}}$ ), and **c** circularly polarized luminescence (CPL) spectra (50 μM, CHCl<sub>3</sub>, r.t.) of enantiomerically pure Ir complex [**2a**]NO<sub>3</sub> (50 μM) with resorcin[4]arene monomer **1a** (0, 300, 600 μM) and **d** dissymmetry factor ( $g_{\text{lum}}$ ) of the CPL property.  $\lambda_{\text{ex}} = 350$  nm. The samples were heated at 50 °C for 1 min before the measurements. These results clearly show that the CD and CPL spectra of the NO<sub>3</sub> salt are not altered significantly upon encapsulation by the symmetric hexameric capsule.

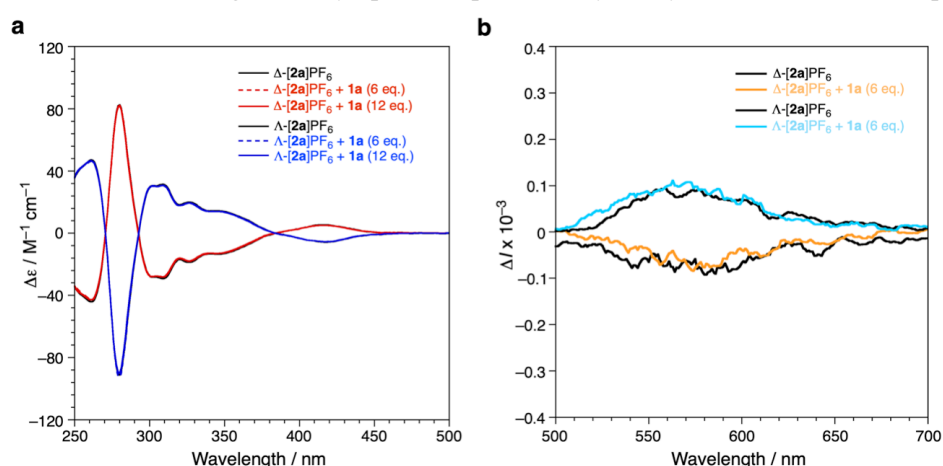

**Supplementary Fig. 48** **a** Circular dichroism (CD) spectra (10 μM, CHCl<sub>3</sub>, r.t.) of  $\Delta$ - and  $\Lambda$ -[**2a**]PF<sub>6</sub> in the presence of resorcin[4]arene **1a** (0, 60, 120 μM), and **b** circularly polarized luminescence (CPL) spectra (50 μM, CHCl<sub>3</sub>, r.t.) of enantiomerically pure Ir complex [**2a**]PF<sub>6</sub> (50 μM) with resorcin[4]arene monomer **1a** (0, 300 μM). The samples were heated at 50 °C for 1 min before the measurements. These results clearly show that the CD and CPL spectra of the PF<sub>6</sub> salt are not altered by the existence of the hexameric capsule.

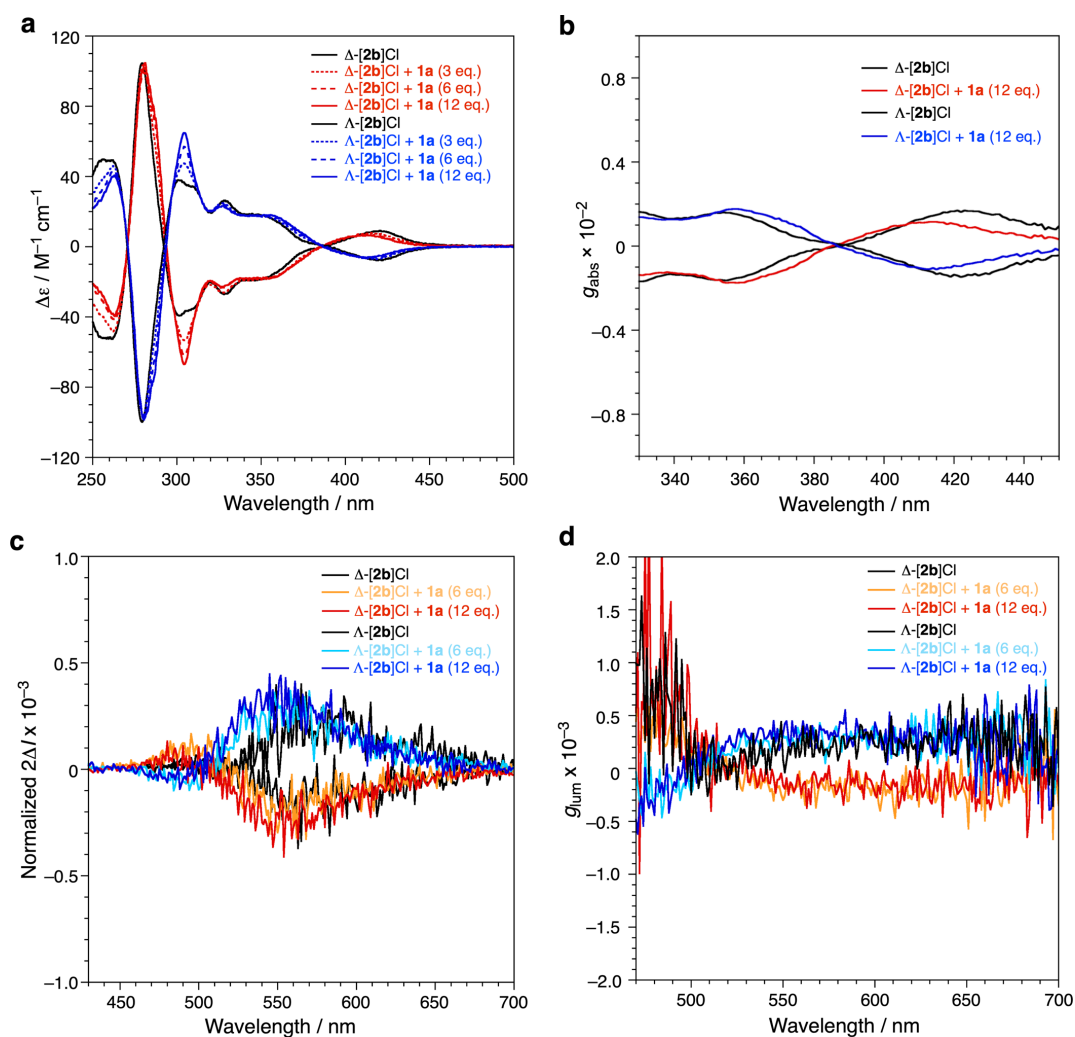

**Supplementary Fig. 49** **a** Circular dichroism (CD) spectra (10  $\mu\text{M}$ ,  $\text{CHCl}_3$ , r.t.) of  $\Delta$ - and  $\Lambda$ -[**2b**]Cl in the presence of resorcin[4]arene **1a** (0, 30, 60, 120  $\mu\text{M}$ ), **b** dissymmetry factor ( $g_{\text{abs}}$ ) of the CD property, which was estimated by the equation ( $g_{\text{abs}} = \Delta\epsilon_{\text{CD}}/\epsilon_{\text{UV-Vis}}$ ), **c** normalized circularly polarized luminescence (CPL) spectra (50  $\mu\text{M}$ ,  $\text{CHCl}_3$ , r.t.) of enantiomerically pure Ir complex [**2b**]Cl (50  $\mu\text{M}$ ) with resorcin[4]arene monomer **1a** (0, 300, 600  $\mu\text{M}$ ), which was obtained from division of the  $2\Delta I$  curve by the maximum of the DC intensity, and **d** dissymmetry factor ( $g_{\text{lum}}$ ) of the CPL property ( $\lambda_{\text{ex}} = 350 \text{ nm}$ ). The samples were heated at 50  $^\circ\text{C}$  for 1 min before the measurements. In contrast to the results of [**2a**]Cl,  $\Delta$ - and  $\Lambda$ -[**2b**]Cl did not show significant improvement of the dissymmetry factor ( $g_{\text{lum}}$ ) upon addition of **1a**, probably because the small guest rotated freely within the typical resorcin[4]arene hexameric capsule and the  $C_2$  molecular symmetry of the guest kept after encapsulation.

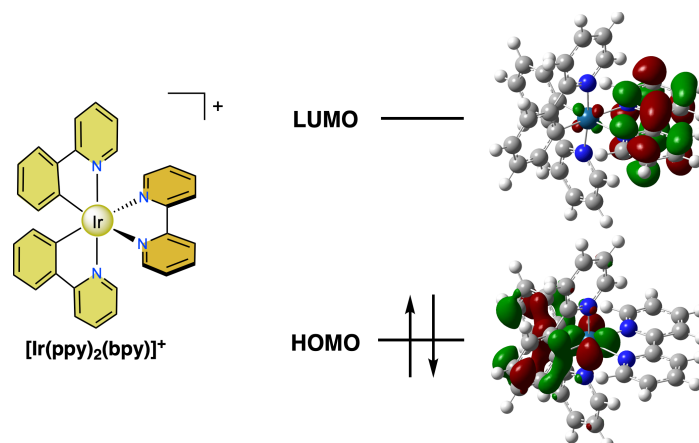

**Supplementary Fig. 50** Frontier orbitals of Ir complex cation  $[\text{Ir}(\text{ppy})_2(\text{bpy})]^+$  in the gas-phase, computed by the time-dependent density functional theory (TD-DFT) calculation using the B3LYP functional. In this calculation, for Ir atom, LANL2DZ basis set was used. For C, N, H atoms, cc-pVDZ basis sets were used. The photoluminescence of these kinds of Ir complex cations originates from  ${}^3\text{MLCT}/{}^3\text{LLCT}$  mixed excited states. Orbital population on the two ppy ligands and two pyridine moieties on the bpy ligand are equivalent in a free complex cation, owing to the  $C_2$  symmetric structure.

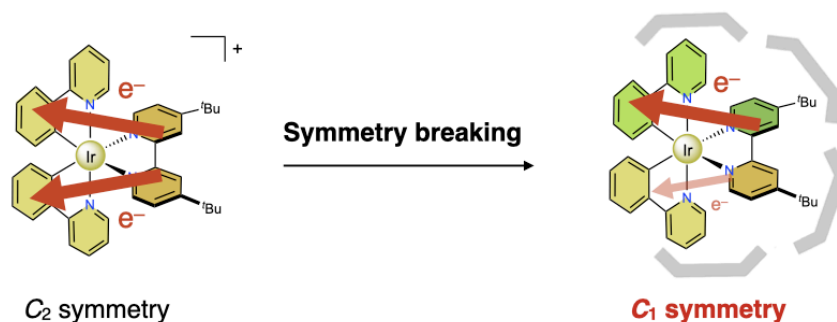

**Supplementary Fig. 51** The vectors show de-excitation transitions (emission). The transition electronic dipole (ED) moment and the transition magnetic dipole (MD) moments were related to the vectors of the electron transition. As the free complex possesses  $C_2$  symmetric structure, electron transition from bpy to ppy moieties is averaged. After vibrational relaxation of the excited state structure upon sensing the asymmetric environment originated from the symmetry-breaking assembly, the ppy ligands are located in different environments to give different contributions in the electron transition, hence enhancing the dissymmetry of the luminescence.



## Supplementary References

- 1 Tunstad, L. M., Tucker, J. A., Dalcanale, E., Weiser, J., Bryant, J. A., Sherman, J. C., Helgeson, R. C., Knobler, C. B. & Cram, D. J. Host-guest complexation. 48. Octol building blocks for cavitands and carcerands. *J. Org. Chem.* **54**, 1305–1312 (1989).
- 2 Tian, N., Thiessen, A., Shiewek, R., Schmitz, O. J., Hertel, D., Meerholz, K. & Holder, E. Efficient Synthesis of Carbazolyl- and Thienyl-Substituted  $\beta$ -Diketonates and Properties of Their Red- and Green-Light-Emitting Ir(III) Complexes. *J. Org. Chem.* **74**, 2718–2725 (2009).
- 3 Helms, M., Lin, Z., Gong, L., Harms, K. & Meggers, E. Method for the Preparation of Nonracemic Bis-Cyclometalated Iridium(III) Complexes. *Eur. J. Inorg. Chem.* **2013**, 4164–4172 (2013).
- 4 Ito, A. & Matsui, Y. Electrochemical and Spectroscopic Behaviors of a Novel Ruthenium(II) Complex with a Six-Membered Chelate Structure. *Inorg. Chem.* **58**, 10436–10443 (2019).
- 5 Yamanaka, M., Shivanyuk, A. & Rebek, J. Jr. Kinetics and Thermodynamics of Hexameric Capsule Formation. *J. Am. Chem. Soc.* **126**, 2939–2943 (2004).
- 6 Innocenzi, P., Kozuka, H. & Yoko, T. Fluorescence Properties of the Ru(bpy)<sub>3</sub><sup>2+</sup> Complex Incorporated in Sol-Gel-Derived Silica Coating Films. *J. Phys. Chem. B* **101**, 2285–2291 (1997).
